# Supplementary material
Source: bioRxiv or medRxiv preprint supplement (https://www.biorxiv.org/content/biorxiv/early/2019/01/10/515064/DC1/embed/media-1.pdf)

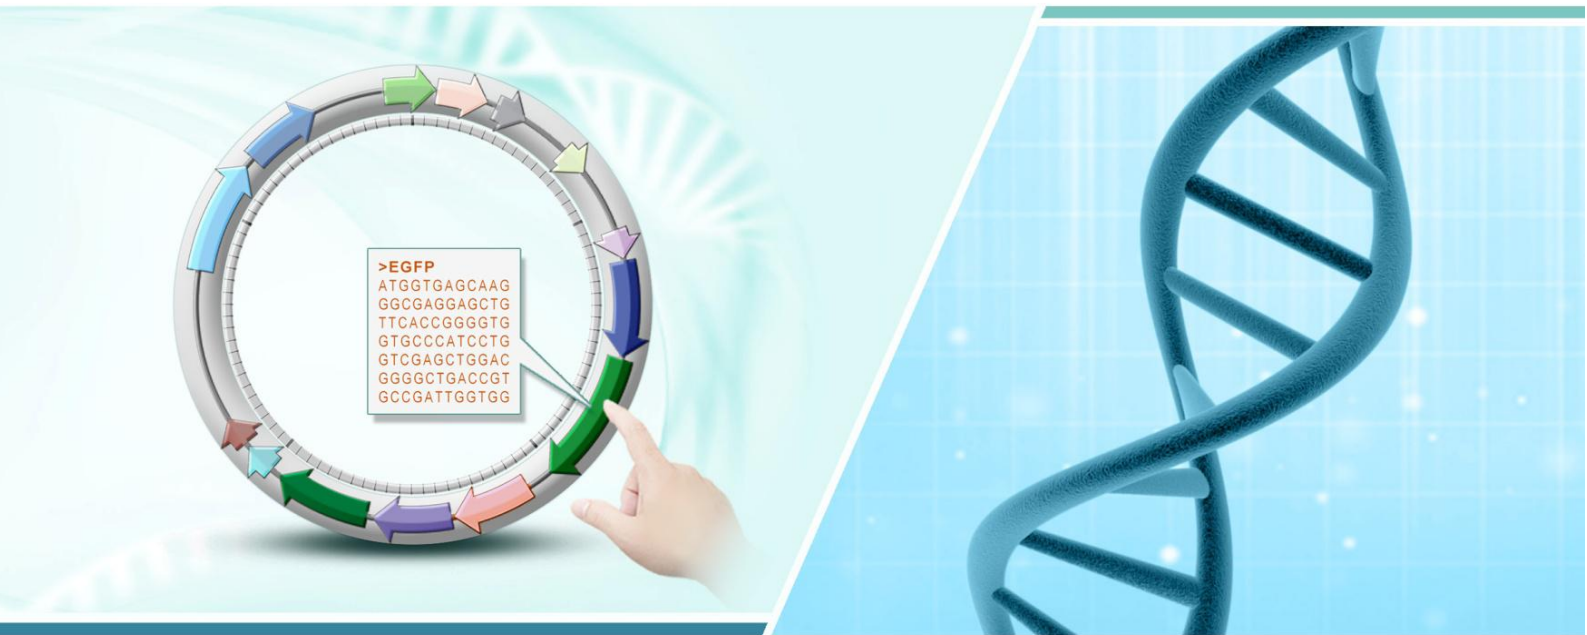

# Vector Report

Quote: TKK-171122-AMW-01  
Project: Mouse Uty Constitutive Knockin

**-Confidential-**

## 1. Quote

TKK-171122-AMW-01

## 2. Gene

Uty

## 3. Objective

To create a mouse Uty constitutive knockin model in C57BL/6 mice

## 4. Summary

- The Uty gene (NCBI Reference Sequence: NM\_009484.3) is located on mouse chromosome Y. Twenty-seven exons have been identified, with the ATG start codon in exon 1 and the TAA stop codon in exon 27.
- In the targeting vector, the KI sequence was inserted into intron 2 of mouse Uty gene in the reverse orientation.
- In the targeting vector, the Neo cassette was flanked by loxP sites. DTA will be used for negative selection.
- C57BL/6 ES cells will be used for gene targeting.

### Wildtype allele

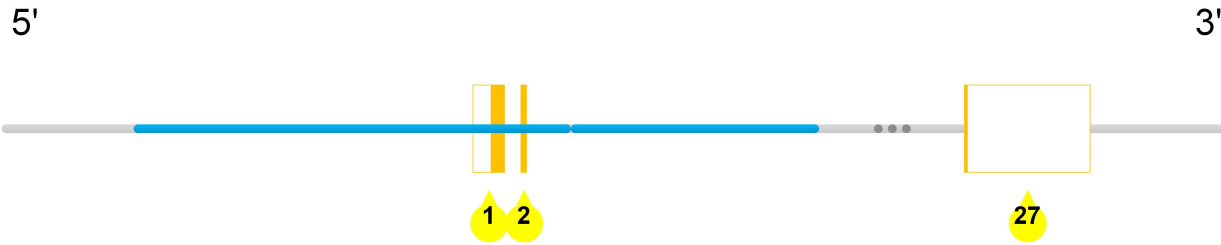

### Targeting vector

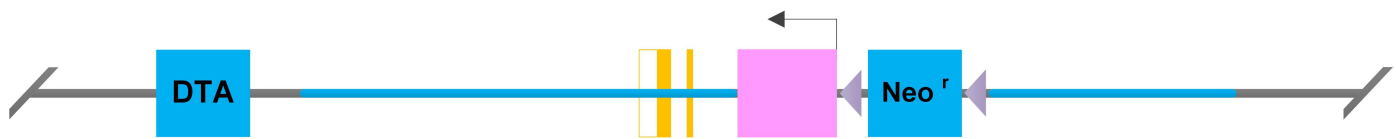

### Targeted allele

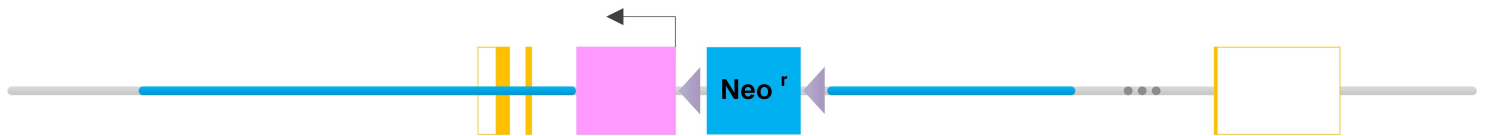

### Constitutive KI allele (After Neo deletion)

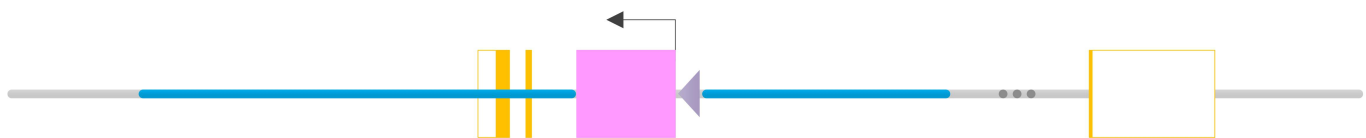

### Legends

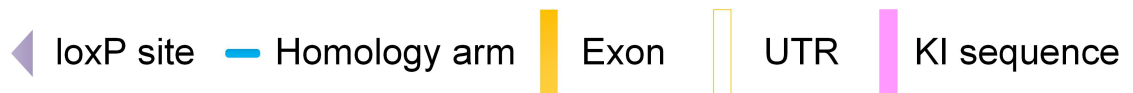

## 5. Method

Mouse genomic fragments containing homology arms (HAs) were amplified from BAC clone by using high fidelity Taq DNA polymerase, and were sequentially assembled into a targeting vector together with recombination sites and selection markers shown below.

### Diagram

Linearized targeting vector

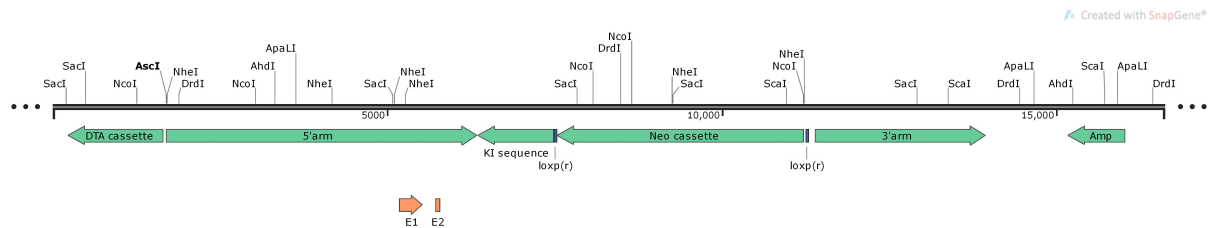

✂ Vector Linearization - AscI

## 6. Result

Your targeting vector was digested by restriction enzymes for confirmation purposes. Units below are all in kilo-base pair (kb).

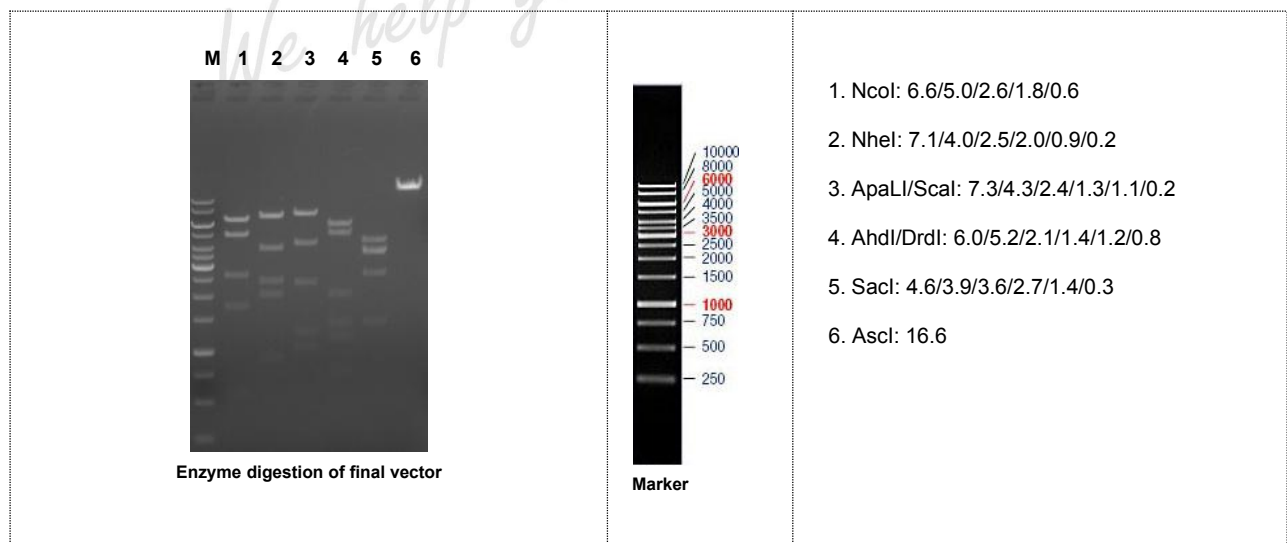

## 7. Sequence of the Final Targeting Vector

|      | Homology arms | KI region | loxP sites | Exons  | Sequence confirmed regions |         |         |        |         |         |
|------|---------------|-----------|------------|--------|----------------------------|---------|---------|--------|---------|---------|
| 1    | CGCTTA        | CAATTT    | CCATTC     | GCCATT | CAGGCT                     | GCGCAA  | CTGTTG  | GGAAGG | GCGATC  | GGTGCG  |
| 61   | GGCCTC        | TTTCGT    | ATTACG     | CCAGCT | GGCGAA                     | AGGGGG  | ATGTGC  | TGCAAG | GCGATT  | AAGTTG  |
| 121  | GGTAAC        | GCCAGG    | GTTTTT     | CCAGTC | ACGACG                     | TTGTAA  | AACGAC  | GGCCAG | TGAATT  | GTAATA  |
| 181  | CGACTC        | ACTATA    | GGGCGA     | ATTGGA | GCTCCA                     | CCGCCC  | GGGCTG  | GTTCTT | TCCGCC  | TCAGAA  |
| 241  | GCCATA        | GAGCCC    | ACCGCA     | TCCCCA | GCATGC                     | CTGCTA  | TTGTCT  | TCCCAA | TCCTCC  | CCCTTG  |
| 301  | CTGTCC        | TGCCCC    | ACCCCA     | CCCCCC | AGAATA                     | GAATGA  | CACCTA  | CTCAGA | CAATGC  | GATGCA  |
| 361  | ATTTCC        | TCATTT    | TATTAG     | GAAAGG | ACAGTG                     | GGAGTG  | GCACCT  | TCCAGG | GTCAAG  | GAAGGC  |
| 421  | ACGGGG        | GAGGGG    | CAAACA     | ACAGAT | GGCTGG                     | CAACTA  | GAAGGC  | ACAGTC | GAGGCT  | GATCAG  |
| 481  | CGAGTG        | CTAGGA    | TCTGCA     | TTCCAC | CACTGC                     | TCCCAT  | TCATCA  | GTTCCA | TAGGTT  | GGAATC  |
| 541  | TAAAAT        | ACACAA    | ACAATT     | AGAATC | AGTAGT                     | TTAACA  | CATTAT  | ACACTT | AAAAAT  | TTTATA  |
| 601  | TTTACC        | TTAGAG    | CTTTAA     | ATCTCT | GTAGGT                     | AGTTTG  | TCCAAT  | TATGTC | ACACCA  | CAGAAG  |
| 661  | TAAGGT        | TCCTTC    | ACAAAG     | AGATCG | CCTGAC                     | ACGATT  | TCCTGC  | ACAGGC | TTGAGC  | CATATA  |
| 721  | CTCATA        | CATCGC    | ATCTTG     | GCCACG | TTTTCC                     | ACGGGT  | TTCAAA  | ATTAAT | CTCAAG  | TTCTAC  |
| 781  | GCTTAA        | CGCTTT    | CGCCTG     | TTCCCA | GTTATT                     | AATATA  | TTCAAC  | GCTAGA | ACTCCC  | CTCAGC  |
| 841  | GAAGGG        | AAGGCT    | GAGCAC     | TACACG | CGAAGC                     | ACCATC  | ACCGAA  | CCTTTT | GATAAA  | CTCTTC  |
| 901  | CGTTCC        | GACTTG    | CTCCAT     | CAACGG | TTCAGT                     | GAGACT  | TAAACC  | TAACTC | TTTCTT  | AATAGT  |
| 961  | TTCGGC        | ATTATC    | CACTTT     | TAGTGC | GAGAAC                     | CTTCGT  | CAGTCC  | TGGATA | CGTCAC  | TTTGAC  |
| 1021 | CACGCC        | TCCAGC    | TTTTCC     | AGAGAG | CGGGTT                     | TTCATT  | ATCTAC  | AGAGTA | TCCCGC  | AGCGTC  |
| 1081 | GTATTT        | ATTGTC    | GGTACT     | ATAAAA | CCCTTT                     | CCAATC  | ATCGTC  | ATAATT | TCCTTG  | TGTACC  |
| 1141 | AGATTT        | TGGCTT    | TTGTAT     | ACCTTT | TTGAAT                     | GGAAATC | TACATA  | ACCAGG | TTTAGT  | CCCGTG  |
| 1201 | GTACGA        | AGAAAA    | GTTTTT     | CATCAC | AAAAGA                     | TTTAGA  | AGAATC  | AACAAC | ATCATC  | AGGATC  |
| 1261 | CATGGC        | ACGCGC    | TTCTAC     | AAGGCG | CTGGCC                     | GAAGAG  | GTGCGG  | GAGTTT | CACGCC  | ACCAAG  |
| 1321 | ATCTGC        | GGCACG    | CTGTTG     | ACGCTG | TTAAGC                     | GGGTGC  | CTGCAG  | GGTCGC | TCGGTG  | TTTCGAG |
| 1381 | GCCACA        | CGCGTC    | ACCTTA     | ATATGC | GAAGTG                     | GACCTG  | GGACCG  | CGCCGC | CCCGAC  | TGCATC  |
| 1441 | TGCGTG        | TTCGAA    | TTCGCC     | AATGAC | AAGACG                     | CTGGGC  | GGGGTT  | TGCTCG | ACATTG  | GGTGGA  |
| 1501 | AACATT        | CCAGGC    | CTGGGT     | GGAGAG | GCTTTT                     | TGCTTC  | CTCTTG  | CAAAAC | CACACT  | GCTCGA  |
| 1561 | CATTGG        | GTGGAA    | ACATTC     | CAGGCC | TGGGTTG                    | GAGAGG  | CTTTTT  | GCTTCC | TCTTGA  | AAACCA  |
| 1621 | CACTGC        | TCGATT    | TGTTAG     | CAGCCT | CGAATC                     | AACCCG  | GGCGAT  | CCTAGG | CATGTA  | GATCTA  |
| 1681 | GCTGTC        | GCGAAG    | AGTGGC     | GCGCCA | CCACCG                     | CCCAGC  | TAGCTT  | TCTTAA | ATTAAG  | CAGTTT  |
| 1741 | CTGTCA        | GTGTTA    | GGGATT     | TTTACC | TGCAAT                     | TCCATC  | ATATTT  | GAATAC | TCTGTG  | ACTGAG  |
| 1801 | ACTGTT        | AGGGTC    | CAGTAA     | TAGCCA | TACAAA                     | CCCCTC  | AGAAGC  | CAATCT | CAGTCA  | TGTATC  |
| 1861 | AATGGT        | TTATTG    | AACACA     | TTCCTA | GACTGA                     | TTAGTC  | AGGAGT  | GGGGAT | CGAAAA  | CTTCAA  |
| 1921 | TAAGGC        | ATTCTT    | CAGAAC     | CAATTT | TTATAT                     | GGGAAA  | AACAAG  | GACTTG | GTACAT  | TTGCAA  |
| 1981 | TGTTTA        | TAACAT    | TTGCAA     | CATTTA | TGCTAT                     | CTAGAC  | AAAGCA  | GTGCTG | TCTGGC  | CTTTAA  |
| 2041 | GCTGAT        | AGGCTA    | TGTATA     | GAGACA | AGGAGA                     | CAAGGA  | GACCTC  | CAAAGT | TCACAA  | GGCTCA  |
| 2101 | GTGAAA        | AAGTAT    | AACAAC     | TTTTTT | TCAGGG                     | CAAGAA  | ACAATA  | GGTCAA | GTAAA   | TTTATG  |
| 2161 | AGCTAC        | AAAATG    | AAGATT     | GAGGGA | ATATGG                     | CAGAAT  | TTTAAT  | ATTTAA | CAGAGA  | AATGTC  |
| 2221 | CTTAAA        | CCCCCA    | AAGAGT     | AATTTA | AAAGGG                     | TTTTTA  | TTATCA  | AACACC | TTTTTC  | TGTTTT  |
| 2281 | AAGATT        | CTCTAT    | GTAGAG     | TAGGTT | GCATTG                     | GACAAAT | TATCTT  | TCTGGC | TTTACT  | TACTGA  |
| 2341 | GTTCTG        | AAATTT    | GAAAGG     | ATTCAC | CATTAT                     | TTCTTT  | GTGGCA  | AATATT | TGTCAA  | CCCCAG  |
| 2401 | AACTCA        | GCAGAT    | ACAATA     | GTGGAA | GAAATA                     | AGTCAG  | CTCTTG  | CTCCCT | CCCTTA  | CCTCTA  |
| 2461 | TTCTCT        | AGCTCT    | TTTGCT     | CCCCTG | CTCCCC                     | CTCTCT  | CCCCAT  | CCCCTT | CCTTGC  | TCTCTC  |
| 2521 | TATGTG        | GTCATG    | GCTGCC     | TTCTGT | TTCTCT                     | ACTATC  | TCACAC  | TCTTTG | CCTTTC  | TACAAT  |
| 2581 | AAATGC        | CTTAAA    | ACCAAA     | AAATAA | AAAATA                     | AGAAAA  | AAGTCA  | GCAGAG | GAGAAAT | GAAAGG  |
| 2641 | ATGGAC        | TACTAC    | TACTTC     | AGAACT | GTTTAA                     | ACCTGA  | GAATTT  | TGAGGA | GAAAGA  | TTGTTT  |
| 2701 | AGTTTC        | AACCCT    | TACAAG     | GGACTG | AGGTAC                     | ATATTT  | TACATA  | TTAAAG | CAGTCC  | TGGCCT  |
| 2761 | CCAGAT        | TCTCCT    | AGCATC     | CCTCAG | TCCCAA                     | CCTGGC  | ATTCTG  | TCTCCA | AACCTA  | AACTTT  |
| 2821 | TCAGGT        | CAGAGG    | CTGGGC     | TACCTT | TCCCCC                     | AGAAGC  | TTCTCC  | CTATAT | AATCCA  | GACATT  |
| 2881 | TGGACA        | ATGACT    | CCCCCC     | CCCATG | TCCCCC                     | TCCTTT  | TCCTTT  | TCCTCC | TCTTCT  | TCCTCT  |
| 2941 | TCCTCC        | CCACCT    | TGTCTT     | ATCCTC | TTTCTC                     | TCTCTC  | TGTCTA  | TCTCTC | TCTCTC  | TCTTCT  |
| 3001 | CCCTTC        | TCTGTG    | TACATG     | AGCTTT | CTCTCT                     | CCATGG  | TAACTT  | CCCTGG | CCTCAG  | TTATTG  |
| 3061 | GGGCCA        | GTGAAC    | TTGCC      | AAGAGC | AGCTTC                     | CCAATA  | AGCCTG  | CCTATA | TATAAA  | ATATTA  |
| 3121 | AAGACC        | TGTTCC    | ACAATA     | TCCAAC | TAAAGC                     | AAGCTT  | TATTTA  | ACACTG | ACTAGG  | AAGTTC  |
| 3181 | AACACT        | GACTAC    | ATTCAT     | GCCAGG | ATTCCA                     | AGAGAA  | ATGGCT  | TTGAAT | TAAAAT  | CAGTCA  |
| 3241 | TGTGAT        | CATGCA    | AAGAAA     | CCTCTA | CAAATC                     | TATGAA  | CTTTCC  | ATATTT | GTCCAA  | TTAGGG  |
| 3301 | GTAAGC        | ATACAT    | CCTCAC     | TGACTT | CCTGTC                     | TGCATA  | TTTCTC  | ACCTGT | GTGTGA  | TCAAGC  |
| 3361 | ATATCC        | TGAGCA    | CTTGGG     | GCAACA | AACCTT                     | GCTATT  | GAACATA | AAACAC | AACCTC  | CAGTAT  |

|      |        |         |        |        |        |        |        |        |        |        |
|------|--------|---------|--------|--------|--------|--------|--------|--------|--------|--------|
| 3421 | TCTGCA | GTTATT  | TGTCCT | TAGGTA | AGTGTA | GCATAC | ACATTA | ACTTTA | AAGAAT | TCCAG  |
| 3481 | AGCTGA | TTTTTT  | GTTTGT | TTGTTT | GTTTGT | TTGTTT | GTTTGT | TTTTGA | GAGAAA | GTTTTT |
| 3541 | CTGTGT | AGCCCT  | GGCTGT | CCTGGA | ACTCAC | TCTGTA | GACCAG | GCTTCC | TCAAAC | TCAGAA |
| 3601 | ATCCAC | CTGCCT  | CTGCCT | CCCAAG | TGCTGG | GATTAA | AGGCGT | GCACCA | CCACGG | CTGGCT |
| 3661 | CTGACT | TTTTTT  | TTTTTT | AAGAGT | TACTTT | ATTTAT | ATGAGT | ACACTG | TTACTG | TTTTCA |
| 3721 | GACACC | CCAGAA  | GAGGGC | ATTGGA | TCCCAT | TACAGA | TGGTTG | TGAACC | ACCATG | TTGGTG |
| 3781 | GTGGGA | ATTGAA  | CTCAGG | ACCTCT | GGAAGA | GCAGTC | AGTGCT | CTTAAC | CATACC | ATGCAG |
| 3841 | TTAGTA | TCTGAG  | AGTAAA | GTAGCA | GAAGCT | ATACAC | CGTCTG | AGAATC | AATTCT | TGTAGT |
| 3901 | GTAGGC | TTCTGG  | AGTCCC | AGAAAC | TGCTTT | TCAAGT | TAAATT | GGGTGC | AGGGAG | GGAGGG |
| 3961 | GGAGAA | TAGGTC  | TAATTG | TTTCTG | AAACCT | TTTGGC | AGAAGG | GTAAAA | GATAAG | TCAGAT |
| 4021 | TGCCTG | TTTTTT  | GCATCT | TATGGC | TTCCAG | GTCTGC | AAAGTG | TTTTAG | AAGCTT | CCTAGA |
| 4081 | ATTTTG | TTATGG  | AAGCTT | TTGAAA | AGACTT | AGACAT | GTTTTG | TGGACC | TGGTTT | GGGGGT |
| 4141 | AGGGAA | TTTACT  | TGAAGA | GGGATT | AGGTAG | TGTTTG | CTAGCC | AGTCTT | CAATAC | AATTCA |
| 4201 | AGTTTA | AGGTCA  | TCTTAG | ATTTAT | AAATAT | TTGTGT | TGGAGA | CTTGTG | ATACTG | GTTTCT |
| 4261 | GAGATG | GGGAAC  | TAGGTT | TCCTTG | TGAAGG | TCCAGG | CCCAGT | AAGTAA | TGGTAA | TACAAG |
| 4321 | TCAATT | CAAAAC  | TCCTGA | GAACAG | CAAAAT | TGGAAC | TTGTCT | TATTAT | ATTTTT | TATTAT |
| 4381 | TGTATT | ATATAT  | AAATGA | ATGCTC | CTCTTA | CAAAGT | GTTGGA | TCATAT | TTACAA | ATTTTA |
| 4441 | GCTACA | ACAACC  | AAAAGG | TCAAAA | GAAATG | GTATTG | TTCTCA | AATGGT | TACTGC | ATCTTC |
| 4501 | AAAATG | CAATGA  | GGGATT | CCCCCG | TCCTTC | CCCCCC | CCCCGC | CCCCTC | ACGTCA | CTCCTT |
| 4561 | GCCCCC | GCAGGG  | ATAACC | TTTGTG | AGGGAC | TGTTCA | TTCACT | ATGATC | TGTTGT | TTAAGG |
| 4621 | ACAAAG | TCATGT  | GACTTT | TATAAA | GTTTTT | TTGGTT | TGATGT | GGTTGA | GTGGAT | GGGTAA |
| 4681 | TTAATG | AGTTTA  | GCTATG | GTGGTG | ACAAAA | AAACAC | GACCCA | GTTACT | CATTGA | GGATGA |
| 4741 | TTTCAA | TTTTAG  | CTGAAT | ACATTT | TGTTTT | CCCAAC | GTGTGT | GTCATT | ACTTCA | AGATCT |
| 4801 | TAATTT | TAAAGT  | TTGCTA | GAATTA | GTATTA | AGGAGC | ACCGAT | TCTGGG | AACTTA | ACAGAA |
| 4861 | GGTGT  | CTGTAA  | GGCAAG | AGGAAA | ATTTTT | TTTTTT | AACTAT | TTGGTC | TCTAAT | TGGCTT |
| 4921 | TCATGT | GCCCTA  | AAAACC | GATGTT | TGATGT | ATTTTT | TCTTAG | TGCTCT | TTGTC  | CTTGTG |
| 4981 | AGATCA | GTATAG  | CAATTA | AATGAA | AGGGTC | TGGATA | TCTAGT | GTGGAA | TAGAAA | AGAGTT |
| 5041 | ACAAAG | CATACC  | TAAAAC | TAATTT | CACTGT | GGTCGG | TAGGTA | GAGCTC | TTAGGC | TGACAT |
| 5101 | CACGAG | CTAGCG  | AAGTAG | CAAGTT | TAGCTG | CACTGG | TGATGA | CGCAAG | TCAACA | AAAGTC |
| 5161 | ACGTGG | GATAAA  | ACGGTT | GCTTCC | ATTGGA | AAGCCT | GGCTTT | AGGGAG | AGGTTA | TGGACG |
| 5221 | TTACGT | GCGGTT  | CACACT | GACGGT | ATTATA | ACAACT | TTATGC | GGATGC | TAGCGA | AGTTTG |
| 5281 | ATATTC | TAAGAA  | CTTCGC | TTAGGT | TCTGCA | ACAATG | AGTTCT | TCTTGC | GTTTAC | CATCTG |
| 5341 | CGTGGT | AATGTG  | ACCAGA | TAGCCT | CTGCCG | CTTTCT | CCTTTG | CCAGTT | TCCATG | AAATCT |
| 5401 | TACGGA | TTATCT  | CTCACT | ACTGCT | GCCCTA | GGTAAT | GAGGAA | AAGAAA | ATGGCG | GCGGAA |
| 5461 | AAGGCT | AGAGGC  | GAGGGC | GAAGAG | GGGTCC | TTCAGT | CTCACA | GTCGAA | GAGAAG | AAGGCG |
| 5521 | CTTTGT | GGATTA  | GATAGG | TACGCA | CTGCTA | ATACTT | ACAGGT | TGTCTT | TCTCTC | TCCGGG |
| 5581 | TTCAAA | AGACTC  | TCCAGG | AGGCCT | GACTGC | ATCTTG | CTTGCG | GTGACG | ACTCGC | TTTCGC |
| 5641 | CTAGCA | CTGTTA  | ACAATG | TTTTGG | GAGATT | TTTTAC | TGATGT | CTTTCT | GTGATC | ATTAAC |
| 5701 | AAGAGC | CATGTA  | TTTCTT | CCACAG | CAGCTT | CTTCGG | GTTCTT | GACCCG | ATGCAA | AGATGG |
| 5761 | CGCCAA | GATGAA  | GACGCT | GTTGAA | CAAGGT | CAGCAA | CTGTTT | AAACAT | AATTAC | TTATAT |
| 5821 | TTTTCT | CCTAAG  | CTTTTC | ACTGTT | CCAAGC | CTGGAG | CCTCTC | CCTACT | CTGAAA | GTGCTC |
| 5881 | ATTATA | GCTTTT  | AGGGAT | CTTTGA | AACTTT | TTTTTT | CCTTCC | CCGTTT | CTCCTT | TCTTTG |
| 5941 | CTTACT | TTCTGT  | ATAGTT | TGAGGC | CCTGCC | TCAGCA | TACAGC | CCAGAG | CACGAG | CTTATT |
| 6001 | TGCAGT | TTTTCT  | GAGGTC | AGCTAT | ATCCTC | CAGTTA | CTCATC | TCAAGT | TATGAG | AAGACG |
| 6061 | CTTGGT | TGTTGC  | AGCCTC | TTGTGA | TATACA | CACGTT | TTATTA | TTTTCC | CATAAG | GACAAA |
| 6121 | GTTATA | GGTAAG  | GAGATA | AAGAGT | TTCCGT | ACTTAA | AAAGAA | TTTTTT | ACGATG | CAGTAG |
| 6181 | TAATAC | TATGCA  | GAAATA | ATACTG | AATTCC | AGTTTG | GAATGT | TAATTT | TTTTTT | TTTTTT |
| 6241 | ACTTCC | TTGTAG  | TTTATT | TTCCAG | AGAGTG | AGAGAG | CACACG | GCATTT | CCTTTG | TGAAAC |
| 6301 | TTTGCA | TTGTCA  | TTTAGT | TATTGG | CTGCTG | GTATCA | ATCAAG | ATGGTG | GCTTAA | GACTGA |
| 6361 | CGGGCA | CCGGAG  | CCAATT | CCCCTT | CCTTTC | AAGACC | TGGTAC | CAAAAA | AGCACC | GACTCG |
| 6421 | GTGCCA | CTTTTT  | CAAGTT | GATAAC | GGACTA | GCCTTA | TTTTAA | CTTGCT | ATTTCT | AGCTCT |
| 6481 | AAAACT | TTTGAG  | GCTCAT | CTCTGC | AGGTGT | TTTCGT | CCTTCC | ACAAGA | TATATA | AAGCCA |
| 6541 | AGAAAT | CGAAAT  | ACTTTC | AAGTTA | CGGTAA | GCATAT | GATAGT | CCATTT | TAAAAC | ATAATT |
| 6601 | TTAAAA | CTGCAA  | ACTACC | CAAGAA | ATTATT | ACTTTC | TACGTC | ACGTAT | TTTGTA | CTAATA |
| 6661 | TCTTTG | TGTTTTA | CAGTCA | AATTAA | TTCCAA | TTATCT | CTCTAA | CAGCCT | TGTATC | GTATAT |
| 6721 | GCAAAT | ATGAAG  | GAATCA | TGGGAA | ATAGGC | CCTCTT | CTAGAA | AAAAAG | CACCGA | CTCGGT |
| 6781 | GCCACT | TTTTCA  | AGTTGA | TAACGG | ACTAGC | CTTATT | TTAACT | TGCTAT | TTCTAG | CTCTAA |
| 6841 | AACATC | TACAAG  | ATTACG | GTCTGG | GTGTTT | CGTCCT | TTCCAC | AAGATA | TATAAA | GCCAAG |
| 6901 | AAATCG | AAATAC  | TTTCAA | GTTACG | GTAAGC | ATATGA | TAGTCC | ATTTTA | AAACAT | AATTTT |
| 6961 | AAAACT | GCAAAC  | TACCCA | AGAAAT | TATTAC | TTTCTA | CGTCAC | GTATTT | TGTACT | AATATC |
| 7021 | TTTGTG | TTTACA  | GTCAAA | TTAATT | CCAATT | ATCTCT | CTAACA | GCCTTG | TATCGT | ATATGC |

7081 AAATAT GAAGGA ATCATG GGAAAT AGGCC TCGGAT CCAAAA AAGCAC GCACTC GGTGCC  
 7141 ACTTTT TCAAGT TGATAA CGGACT AGCCTT ATTTTA ACTTGC TATTTT TAGCTC TAAAC  
 7201 CGATTG GCCCGG TGGCAG TGGGTG TTTTCG CTTTTC CACAAG ATATAT AAAGCC AAGAAA  
 7261 TCGAAA TACTTT CAAGTT ACGGTA AGCATA TGATAG TCCATT TTAATA CATAAT TTTAAA  
 7321 ACTGCA AACTAC CCAAGA AATTAT TACTTT CTACGT CACGTA TTTTGT ACTAAT ATCTTT  
 7381 GTGTTT ACAGTC AAATTA ATTCCA ATTATC TCTCTA ACAGCC TTGTAT CGTATA TGCAAA  
 7441 TATGAA GGAATC ATGGGA AATAGG CCCTCA CGCGTG CGGCCG CCTCGA GGGACC TAATAA  
 7501 CTTTCG ATAGCA TACATT ATACGA AGTTAT ATTAAG GGTTC GCAAGC TCTAGT CGAGCC  
 7561 CCAGCT GGTTC TCCCGC CTCAGA AGCCAT AGAGCC CACCGC ATCCCC AGCATG CCTGCT  
 7621 ATTGTC TTCCCA ATCCCT CCCCTT GCTGTC CTGCCC CACCCC ACCCCC CAGAAT AGAATG  
 7681 ACACCT ACTCAG ACAATG CGATGC AATTTT CTCATT TTATTA GGAAAG GACAGT GGGAGT  
 7741 GGCACC TTCCAG GGTCAA GGAAGG CACGGG GGAGGG GCAAAC AACAGA TGGCTG GCAACT  
 7801 AGAAGG CACAGT CGAGGC TGATCA GCGAGC TCTAGA GAATTG ATCCCC TCAGAA GAACTC  
 7861 GTCAAG AAGGCG ATAGAA GGCGAT GCGCTG CGAATC GGGAGC GGCGAT ACCGTA AAGCAC  
 7921 GAGGAA GCGGTC AGCCCA TTCGCC GCCAAG CTCTTC AGCAAT ATCACG GGTAGC CAACGC  
 7981 TATGTC CTGATA GCGGTC CGCCAC ACCCAG CCGGCC ACAGTC GATGAA TCCAGA AAAGCG  
 8041 GCCATT TTCCAC CATGAT ATTCGG CAAGCA GGCATC GCCATG GGTAC GACGAG ATCATC  
 8101 GCCGTC GGGCAT GCGCGC CTTGAG CCTGGC GAACAG TTCGGC TGGCGC GAGCCC CTGATG  
 8161 CTCTTC GTCCAG ATCATC CTGATC GACAAG ACCGGC TTCCAT CCGAGT ACGTGC TCGCTC  
 8221 GATGCG ATGTTT CGCTTG GTGGTC GAATGG GCAGGT AGCCGG ATCAAG CGTATG CAGCCG  
 8281 CCGCAT TGCATC AGCCAT GATGGA TACTTT CTCGGC AGGAGC AAGGTG AGATGA CAGGAG  
 8341 ATCCTG CCCCAG CACTTC GCCCAA TAGCAG CCAGTC CCTTCC CGCTTC AGTGAC AACGTC  
 8401 GAGCAC AGCTGC GCAAGG AACGCC CGTCGT GGCCAG CCACGA TAGCCG CGCTGC CTCGTC  
 8461 CTGCAG TTCATT CAGGGC ACCGGA CAGGTC GGTCTT GACAAA AAGAAC CGGGCG CCCCTG  
 8521 CGCTGA CAGCCG GAACAC GGCGGC ATCAGA GCAGCC GATTGT CTGTTG TGCCCA GTCATA  
 8581 GCCGAA TAGCCT CTCCAC CCAAGC GGCCGG AGAAC TGCGTG CAATCC ATCTTG TTCAAT  
 8641 GGCCGA TCCCAT GGTTTA GTTCTT CACTTT GTGCTA TTATAC TATGCC GATATA CTATGC  
 8701 CGATGA TTAATT GTCAAC AGGCTG CAGGTC GAAAGG CCCGGA GATGAG GAAAG GAGAAC  
 8761 AGCGCG GCAGAC GTGCGC TTTTGA AGCGTG CAGAAT GCCGGG CCTCCG GAGGAC CTTCGG  
 8821 GCGCCC GCCCG CCCCTG AGCCCG CCCCTG AGCCCG CCCCCG GACCCA CCCCTT CCCAGC  
 8881 CTCTGA GCCCAG AAAGCG AAGGAG CAAAGC TGCTAT TGGCCG CTGCCC CAAAGG CCTACC  
 8941 CGCTTC CATTGC TCAGCG GTGCTG TCCATC TGCACG AGACTA GTGAGA CGTGCT ACTTCC  
 9001 ATTTGT CACGTC CTGCAC GACGCG AGCTGC GGGGCG GGGGGG AACTTC CTGACT AGGGGA  
 9061 GGAGTA GAAGGT GCGCGG AAGGGG CCACCA AAGAAC GGAGCC GGTGG CGCCTA CCGGTG  
 9121 GATGTG GAATGT GTGCGA GGCCAG AGGCCA CTTGTG TAGCGC CAAGTG CCCAGC GGGGCT  
 9181 GCTAAA GCGCAT GCTCCA GACTGC CTTGGG AAAAGC GCCTCC CCTACC CGGTAG AATTTT  
 9241 GACGAC CTGCAG CCAAGC TAGCTT CGCGAG CTCGAC CGAACA AACGAC CCAACA CCCGTG  
 9301 CGTTTT ATTCTG TCTTTT TATTGC CGCTCA GCTTTA CAGTGA CAATGA CGGCTG GCGACT  
 9361 GAATAT TAGTGC TTACAG ACAGCA CTACAT ATTTTC CGTCGA TGTTGA AATCCT TTCTCA  
 9421 TATGTC ACCATA AATATC AAATAA TTATAG CAATCA TTTACG CGTTAA TGGCTA ATCGCC  
 9481 ATCTTC CAGCAG GCGCAC CATTGC CCCTGT TTTACT ATCCAG GTTACG GATATA GTTCAT  
 9541 GACAAAT ATTTAC ATTGGT CCAGCC ACCAGC TTGCAT GATCTC CCGTAT TGAAC TCCAGC  
 9601 GCGGGC CATATC TCGCGT GGCTCC GACACG GGCAT GTGTCC AGACCA GGCCAG GTATCT  
 9661 CTGACC AGAGTC ATCCCT AGCGCC GTAAAT CAATCG ATGAGT TGCTTC AAAAAT CCCTTC  
 9721 CAGGGC GCGAGT TGATAG CTGGCT GGTGGC AGATGG CGCGGC AACACC ATTTTT TCTGAC  
 9781 CCGGCA AAACAG GTAGTT ATTCGG ATCATC AGCTAC ACCAGA GACGGA AATCCA TCGCTC  
 9841 GACCAG TTTAGT TACCCC CAGGCT AAGTGC CTTCTC TACACC TGCGGT GCTAAC CAGCGT  
 9901 TTTTCG TCTGCC AATATG GATTAA CATTCT CCCACC GTCAGT ACGTGA GATATC TTTAAC  
 9961 CCTGAT CCTGGC AATTTT GGCTAT ACGTAA CAGGGT GTTATA AGCAAT CCCCAG AAATGC  
 10021 CAGATT ACGTAT ATCCTG GCAGCG ATCGCT ATTTTC CATGAG TGAACG AACCTG GTCGAA  
 10081 ATCAGT GCGTTC GAACGC TAGAGC CTGTTT TGCACG TTCACC GGCATC AACGTT TTCTTT  
 10141 TCGGAT CCGCCG CATAAC CAGTGA AACAGC ATTGCT GTCACT TGGTCG TGGCAG CCCGGA  
 10201 CCGACG ATGAAG CATGTT TAGCTG GCCCAA ATGTTG CTGGAT AGTTTT TACTGC CAGACC  
 10261 GCGCGC CTGAAG ATATAG AAGATA ATCGCG AACATC TTCAGG TTCTGC GGGAAA CCATTT  
 10321 CCGGTT ATTCAA CTTGCA CCATGC CGCCCA CGACCG GCAAAC GGACAG AAGCAT TTTCCA  
 10381 GGTATG CTCAGA AAACGC CTGGCG ATCCCT GAACAT GTCCAT CAGGTT CTTGCG AACCTC  
 10441 ATCACT CGTTGC ATCGAC CCGTAA TGCAGG CAAATT TTGGTG TACGGT CAGTAA ATTGGA  
 10501 CACCTT CCTCTT CTTCTT GGGCAT GGCCGC AGGAAA GCAGAG CCCTGA AGCTCC CATCAC  
 10561 CCGCCA ATAAGA GCCAAG CCTGCA GTGTGA CCTCAT AGAGCA ATGTGC CAGCCA GCCTGA  
 10621 CCCCCA GGGCCC TCAGGC TTGGGC AACTG TCTCTA GGACCC TGAGAG AAAGC ATACCC  
 10681 ATTTCT GCTTAG GGCCCT GAGGAT GAGCCC AGGGGT GGCTTG GCACCT AAGCAA AGGACA



10741 CTGGGG CTCAGC TGGCAG CAAAGT GACCAG GATGCT GAGGCT TTGACC CAGAAG CCAGAG  
10801 GCCAGA GGCCAG GACTTC TCTTGG TCCCAG TCCACC CTCACT CAGAGC TTTACC AATGCC  
10861 CTCTGG ATAGTT GTCGGG TAACGG TGGACG CCACTG ATTCTC TGGCCA GCCTAG GACTTC  
10921 GCCATT CCGCTG ATTCTG CTCTTC CAGCCA CTGGCT GACCGG TTGGAA GTACTC CAGCAG  
10981 TGCCTT GGCATC CAGGGC ATCTGA GCCTAC CAGGTC CTTTCT TACCTC CTGCCA GGGCCT  
11041 GGAGCA GCCAGC CTGCAA CACCTG CCTGCC AAGCAG AGTGAC CACTGT GGGCAC AGGGGA  
11101 CACAGG GTGGGG CCCACA ACAGCA CCATTG TCCACT TGTCCC TCACTA GTAAAA GAACTC  
11161 TAGGGT TGCGGG GGGTGG GGGAGG TCTCTG TGAGGC TGGTAA GGGATA TTTGCC TGGCCC  
11221 ATGGAG CTAGCT TGGCTG GACGTA AACTCC TCTTCA GACCTA **ATAACT TCGTAT AGCATA**  
11281 **CATTAT ACGAAG TTATAT** TAAGGG TTATTG AATATG ATCGGA ATTGGG CTGCAG GAATTC  
11341 GATAGC TTGGCT GCAGGT CGACGT ACGTAG CAAGCT TGATGG GCCCTG GTACCG AAATAG  
11401 AGGGAG GAGAGG GGAAAT GAAACA GTTTTA GAAAGG AAACAG GGTAGT TTTACC AAGAAA  
11461 ATATTA AACCTA GCAAGT ACAGGT TAATGA AAAGTA TTCCCC ATTACT TAAAAG GAGAAAT  
11521 TATCAA GTCTTT TTAAAC CTTTAA AAAAAAG ATTCTT AGCCGG GCGGGG TGGCAC ATGCCT  
11581 TTAATC CCAGCA CTTGGG AGGCAG AGGCAG GCAGAT TTCTGA GTTTGA GGCCAG TCTGGT  
11641 CTACAG AGTGAG TTCCAG GACAGC CAGGGC TACACA GAGATA CCCTGT CTCAA AAAAAA  
11701 AAAAAA ATTCTT AAAGGT AACATA TTTAGA TACTTG TAAACC ATAGCA AAAAAA GCACAG  
11761 ATCTGT GACATA CATACT TGTTAC CATTAT ATAGTT TCCGTT CTAATG AAAATC AGTGAT  
11821 TATAAA CTTGAT AATTTT ATACCA CCAATG AAGTAT TAATAG TATTCT TTTTGT GTTTTT  
11881 GGAGAC AGGGTT TCTCAG TATAGC TCTGGT TGCTAT ACAGTT AATAGT GTTCTT AACATA  
11941 TATGTG TATATA TAAATT TATGTA TGTATG TATATA TATATA TACATA TATATA TATGCA  
12001 TATTAT GCACAC ATAATT TTTGGT TTGGTT TGGTTG TGAGCC TAGCCT TTAAGG ACTGAG  
12061 TCCAAG ATTTAA AACTTC TTCAGG TGATAT GTATAG AAACAT ATTTCT GTTTAC TAGTAG  
12121 GTTGCT AGGTTT CTGGTG TACAGT GGGTAA TTTTAA ATTTGA TGTTAA CCTCCA CACTCT  
12181 TTTAAG ATTTCA TGGTAA AAGCTT AAAGAA ATGATT TTGTCT AGTTTT TATTTT TATTTT  
12241 TTAATT TTTTTT ATTTTT TTGGTT TTTGGA GACAGG GTTTCT CTGTAT AGCTAT GGCTGT  
12301 CCTGGA ACTCAC TTTGTA GACCAG CTGGGC CTCAAA CTCAGA AATCTG CCTGTC TCTCCC  
12361 TCCTGA GTGCTG GGATTA AAGGCA TGCACC ACCACG CCTGAC GTGGTT TTTAAA GATATA  
12421 ATTATT TAACCTA TATCTT AGCATT TCTTTT TTTTTT TTAGAG TAGTAA TTCTTA TATTAT  
12481 AAAAAA GACTTG GTGTTG AATGTA TTTTTG GAGTGA CTACAA CAACTA TGTGTG ATCCTG  
12541 TTTGTC CTAGAA CTCACA GACAGA AATATC ACTTTC TCTGCT TTCTCA TTGCTC ATTGCT  
12601 AAGATT AAAGCC CTGTTT TCCTAA AACTGG CTTCTT TTAAT TTAATA ATTTTG TATATA  
12661 TTCATG TCTGGA AGTTAT AGGACA AATTGT GGAAGT CAGTTT TCTTCT TCTATC ATGTCA  
12721 GGGCTG GAGGCA AGTCCT TTTACT AGCTAA GCCACT TCCTTG AACTTT CAGTTT ATGTGT  
12781 ATAGTG TTTCTA CTGCTT GTAGGT CTATTC CACTTG AGTGTC TGGTTC TACTAA GGAGTT  
12841 TAGAAG AGACAG ACCTAT GGAAGT GGAATT AGTGAA GGTGTG GAGCTT CACTAA TCAAAC  
12901 CAGTGT TCTCTT GCAGAG CTCTTT AGTTTA TTTAAG TAGCAT ATATTT TTCAGG TGCTTT  
12961 GTAATA TCAATT TATATG TTAGTA AACTGT TTTCAA ATATTG AAATAA CAGGTA TTTTTT  
13021 AACTAA TTGCAA CAGCAT TTTAAA AATGAG AAGTTA AAAACA AAATAT GAGAAA CTATCA  
13081 AGTGCC ACTGTT CTTAGA ACATTT ATGAGT TGTGCC TTTATT AAACAT TGAGTA ATATGT  
13141 ATTTTT GTTTTA GATCAG TCTCAG CCTTTC TAATGC AGTTTC TCATGT TGTGAT GACCCC  
13201 CAACCA TAAAAT TATTTT TGTTGT TATTCA TAACCTA ATTTTG GTGCTG TTATGA ATCATT  
13261 ATGTAA ATATCT GAATAG TTTATT AGTGAC CAAAAA GGTATT TTGACC CATAGG TTGAGA  
13321 ACCATT ATTTTA GACACT GTCTTA GTCTAT ATTTTG TTGCC AGAATA GCTTA AATTTG  
13381 AAGAAG TACTCA TCTCTC AGCCTC CAAGTA TTGAGA TTTTCA GATATG GCTTCT ACTCTT  
13441 TAACAG TTATTA AAATGT ATTACA ATTATA ATTTAA AATGAC AAGTAT TAAAAA CTGAAA  
13501 TATAGG GCTGGT GAGATG GCTCAG TGGGTA AGAGCA CCCGAC TGCTCT TCCGAA GGTCCA  
13561 GAGTTC AAATCC CAGCAA CCACAT GGTGGC TCACAA CCATCC ATAACG AGATCT GACTCC  
13621 CTCTTC TGGAGT GTCTGA AGACAG CTACAG TGTACT TACATA TAATAA ATAAAT CTTTAA  
13681 AAAAAA AAAAAC AAAAAA AAACCT GAAATA TATAAA GGGCAA TTGATG GATGGT GGTGGA  
13741 ATATCC CTTTAT CCTAGC ACTGTG CAGAGG CAGTTG GGTCTC TTATAA GTTTGA GGCCAG  
13801 CCTGAT CTACAT AGCAAG TTTTCA GACAGC AAGATT AGACAG AGAAAC CTGCCT CAAAAA  
13861 AGGACA ATTTGT TTTTAA GCCTGA CAGTGG TGGCAT ACACCT TTAAC CCAGCA CTTGGG  
13921 GGACAT AGGCAG ATAGAT CTTTGG CGGCCG CGTACC AGCTTT TGTTCC CTTTAG TGAGGG  
13981 TTAATT TCGAGC TTGGCG TAATCA TGGTCA TAGCTG TTTTCT GTGTGA AATTGT TATCCG  
14041 CTCACA ATTCCA CACAAC ATACGA GCCGGA AGCATA AAGTGT AAAGCC TGGGGT GCCTAA  
14101 TGAGTG AGCTAA CTCACA TTAATT GCGTTG CGCTCA CTGCCC GCTTTC CAGTCG GGAAAC  
14161 CTGTCG TGCCAG CTGCAT TAATGA ATCGGC CAACGC GCGGGG AGAGGC GGTTTG CGTATT  
14221 GGGCGC TCTTCC GCTTCC TCGCTC ACTGAC TCGCTG CGCTCG GTCGTT CGGCTG CGGCGA  
14281 GCGGTA TCAGCT CACTCA AAGGCG GTAATA CGGTTA TCCACA GAATCA GGGGAT AACGCA  
14341 GGAAAG AACATG TGAGCA AAAGGC CAGCAA AAGGCC AGGAAC CGTAAA AAGGCC GCGTTG



14401 CTGGCG TTTTTC CATAGG CTCCGC CCCCCT GACGAG CATCAC AAAAAT CGACGC TCAAGT  
14461 CAGAGG TGGCGA AACCCG ACAGGA CTATAA AGATAC CAGGCG TTTCCC CCTGGA AGCTCC  
14521 CTCGTG CGCTCT CCTGTT CCGACC CTGCCG CTTACC GGATAC CTGTCC GCCTTT CTCCCT  
14581 TCGGGA AGCGTG GCGCTT TCTCAT AGCTCA CGCTGT AGGTAT CTCAGT TCGGTG TAGGTC  
14641 GTTCGC TCCAAG CTGGGC TGTGTG CACGAA CCCCCC GTTCAG CCCGAC CGCTGC GCCTTA  
14701 TCCGGT AACTAT CGTCTT GAGTCC AACCCG GTAAGA CACGAC TTATCG CCACTG GCAGCA  
14761 GCCACT GGTAAC AGGATT AGCAGA GCGAGG TATGTA GGCGGT GCTACA GAGTTC TTGAAG  
14821 TGGTGG CCTAAC TACGGC TACACT AGAAGA ACAGTA TTTGGT ATCTGC GCTCTG CTGAAG  
14881 CCAGTT ACCTTC GGAAAA AGAGTT GGTAGC TCTTGA TCCGGC AAACAA ACCACC GCTGGT  
14941 AGCGGT GTTTTT TTTGTT TGCAAG CAGCAG ATTACG CGCAGA AAAAAA GGATCT CAAGAA  
15001 GATCCT TTGATC TTTTCT ACGGGG TCTGAC GCTCAG TGGAAC GAAAAC TCACGT TAAGGG  
15061 ATTTTG GTCATG AGATTA TCAAAA AGGATC TTCACC TAGATC CTTTTA AATTAA AAATGA  
15121 AGTTTT AAATCA ATCTAA AGTATA TATGAG TAAACT TGGTCT GACAGT TACCAA TGCTTA  
15181 ATCAGT GAGGCA CCTATC TCAGCG ATCTGT CTATTT CGTTCA TCCATA GTTGCC TGACTC  
15241 CCCGTC GTGTAG ATAACT ACGATA CGGGAG GGCTTA CCATCT GGCCCC AGTGCT GCAATG  
15301 ATACCG CGAGAC CCACGC TCACCG GCTCCA GATTTA TCAGCA ATAAAC CAGCCA GCCGGA  
15361 AGGGCC GAGCGC AGAAGT GGTCCCT GCAACT TTATCC GCCTCC ATCCAG TCTATT AATTGT  
15421 TGCCGG GAAGCT AGAGTA AGTAGT TCGCCA GTTAAT AGTTTG CGCAAC GTTGTT GCCATT  
15481 GCTACA GGCATC GTGGTG TCACGC TCGTCG TTTGGT ATGGCT TCATTC AGCTCC GGTTC  
15541 CAACGA TCAAGG CGAGTT ACATGA TCCCCC ATGTTG TGCAAA AAAGCG GTTAGC TCCTTC  
15601 GGTCCCT CCGATC GTTGTC AGAAGT AAGTTG GCCGCA GTGTTA TCACTC ATGGTT ATGGCA  
15661 GCACTG CATAAT TCTCTT ACTGTC ATGCCA TCCGTA AGATGC TTTTCT GTGACT GGTGAG  
15721 TACTCA ACCAAG TCATTC TGAGAA TAGTGT ATGCGG CGACCG AGTTGC TCTTGC CCGGCG  
15781 TCAATA CGGGAT AATACC GCGCCA CATAGC AGAACT TTAAAA GTGCTC ATCATT GGAAAA  
15841 CGTTCT TCGGGG CGAAAA CTCTCA AGGATC TTACCG CTGTTG AGATCC AGTTCG ATGTAA  
15901 CCCACT CGTGCA CCCAAC TGATCT TCAGCA TCTTTT ACTTTC ACCAGC GTTCTT GGTGA  
15961 GCAAAA ACAGGA AGGCAA AATGCC GCAAAA AAGGGA ATAAGG GCGACA CGGAAA TGTGA  
16021 ATACTC ATACTC TTCCTT TTTCAA TATTAT TGAAGC ATTTAT CAGGGT TATTGT CTCATG  
16081 AGCGGA TACATA TTTGAA TGTATT TAGAAA AATAAA CAAATA GGGGTT CCGCGC ACATTT  
16141 CCCCCG AAAGTG CCACCT GACGCG CCCTGT AGCGGC GCATTA AGCGCG GCGGGT GTGGTG  
16201 GTTACG CGCAGC GTGACC GCTACA CTTGCC AGCGCC CTAGCG CCCGCT CCTTTC GCTTTC  
16261 TTCCCT TCCTTT CTCGCC ACGTTC GCCGGC TTTCCC CGTCAA GCTCTA AATCGG GGGCTC  
16321 CCTTTA GGGTTC CGATTT AGTGCT TTACGG CACCTC GACCCC AAAAAA CTTGAT TAGGGT  
16381 GATGGT TCACGT AGTGGG CCATCG CCCTGA TAGACG GTTTTT CGCCCT TTGACG TTGGAG  
16441 TCCACG TTCTTT AATAGT GGACTC TTGTTC CAAACT GGAACA ACACCT AACCTT ATCTCG  
16501 GTCTAT TCTTTT GATTTA TAAGGG ATTTTG CCGATT TCGGCC TATTGG TTAAAA AATGAG  
16561 CTGATT TAACAA AAATTT AACGCG AATTTT AACAAA ATATTA A

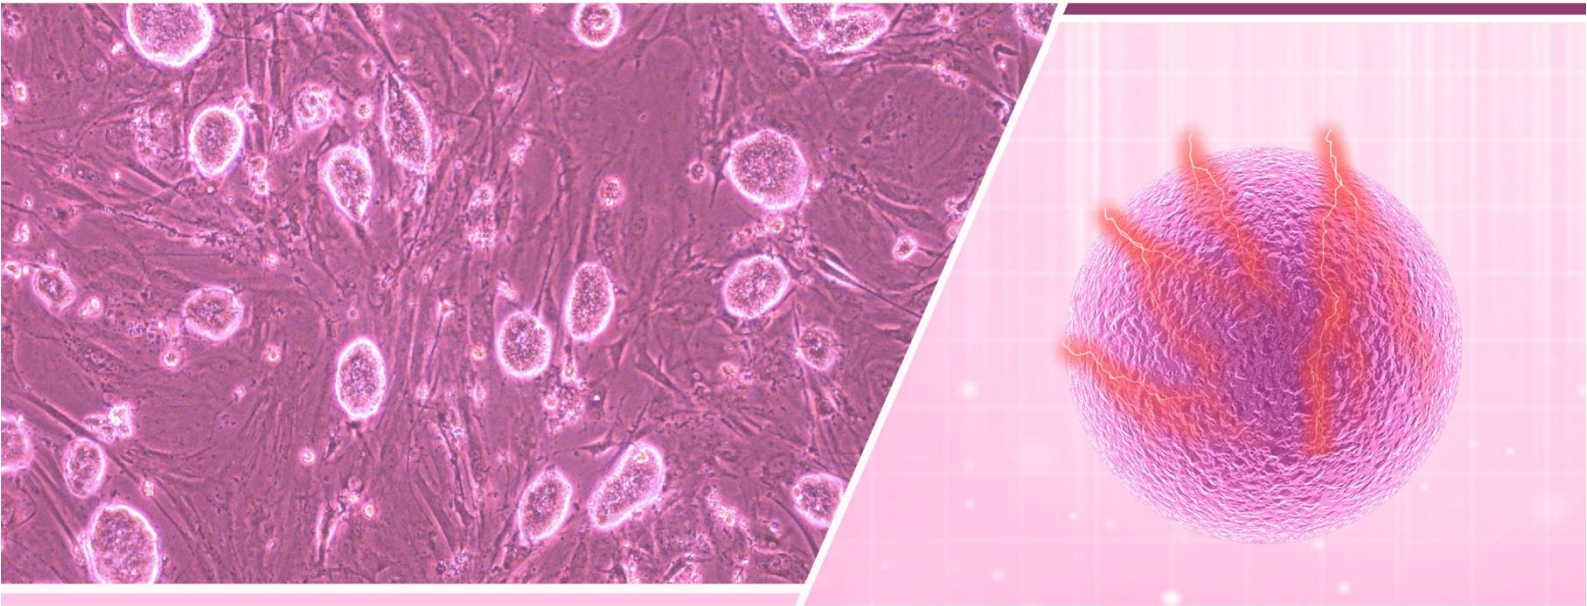

# ES Cell Report

Quote: TTK-171122-AMW-01  
Project: Mouse Uty Constitutive Knockin

**-Confidential-**

## 1. Summary

The Uty targeting construct was linearized by restriction digestion with *Ascl*, followed by phenol/chloroform extraction and ethanol precipitation. The linearized vector was transfected into C57BL/6 ES cells according to cyagen's standard electroporation procedures. The transfected ES cells were subject to G418 selection (200 µg/mL) 24 hours post electroporation. 188 G418 resistant clones were picked and amplified in 96-well plates. Two copies of 96-well plates were made, one copy was frozen down and stored at -80°C and the other copy of the 96-well plates was used for DNA isolation and subsequent PCR screening for homologous recombination. The PCR screening identified 4 potential targeted clones, from among which 4 were expanded and further characterized by Southern blot analysis. All of the four expanded clones were confirmed to be correctly targeted.

### 1.1. PCR Screening

Regions in the following diagram were selected for PCR screening.

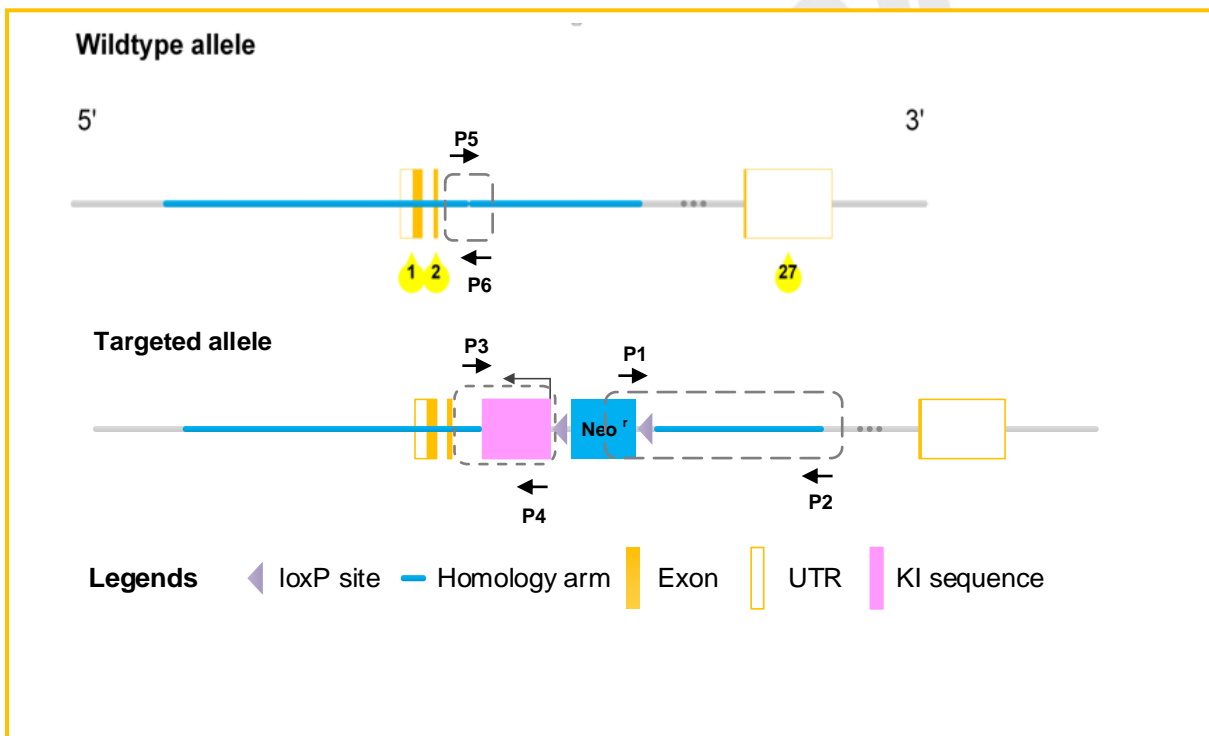

### 1.1.1. 3'arm PCR

#### Primers for 3'arm PCR:

Neo-F (P1): 5'-CAGCACCATTTGCCACTTGTCC-3'

3'arm-R (P2): 5'-CACAGGTCTGACTCAAAAAACGAC-3'

#### Expected PCR Product:

Wildtype: N.A.

Targeted: ~3.0 kb

#### Reaction Mix:

| Component                  | x1           |
|----------------------------|--------------|
| ES cell genomic DNA        | 2.0 $\mu$ l  |
| Forward primer(10 $\mu$ M) | 0.8 $\mu$ l  |
| Reverse primer(10 $\mu$ M) | 0.8 $\mu$ l  |
| dNTPs(2.5 mM)              | 2.4 $\mu$ l  |
| 5X LongAmp Taq Reaction    | 4.0 $\mu$ l  |
| LongAmp Taq DNA Polymerase | 1.2 $\mu$ l  |
| ddH <sub>2</sub> O         | 8.8 $\mu$ l  |
| Total                      | 20.0 $\mu$ l |

#### Cycling Condition:

| Step                 | Temp. | Time   | Cycles |
|----------------------|-------|--------|--------|
| Initial denaturation | 94 °C | 3 min  | 33 x   |
| Denaturation         | 94 °C | 30s    |        |
| Annealing            | 60 °C | 30s    |        |
| Extension            | 65 °C | 50s/kb |        |
| Additional extension | 65 °C | 10min  |        |

#### PCR Result:

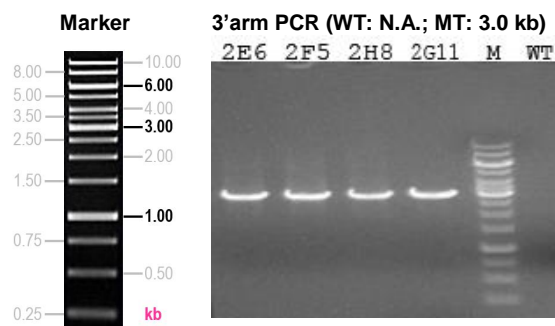

### 1.1.2. KI PCR

The potentially targeted clones were further screened by PCR for the presence of the KI site.

#### Primers for KI PCR:

KI-F (P3): 5'-CTCAAGTTATGAGAAGACGCTTGG-3'

KI-R (P4): 5'-TCGACTAGAGCTTGCGGAACCCT-3'

#### Expected PCR Product:

Wildtype: N.A.

Targeted: ~1.5 kb

#### Reaction Mix:

| Component                  | x1           |
|----------------------------|--------------|
| ES cell genomic DNA        | 2.0 $\mu$ l  |
| Forward primer(10 $\mu$ M) | 0.8 $\mu$ l  |
| Reverse primer(10 $\mu$ M) | 0.8 $\mu$ l  |
| dNTPs(2.5 mM)              | 2.4 $\mu$ l  |
| 5X LongAmp Taq Reaction    | 4.0 $\mu$ l  |
| LongAmp Taq DNA Polymerase | 1.2 $\mu$ l  |
| ddH <sub>2</sub> O         | 8.8 $\mu$ l  |
| Total                      | 20.0 $\mu$ l |

#### Cycling Condition:

| Step                 | Temp. | Time   | Cycles |
|----------------------|-------|--------|--------|
| Initial denaturation | 94 °C | 3 min  | 33 x   |
| Denaturation         | 94 °C | 30s    |        |
| Annealing            | 60 °C | 30s    |        |
| Extension            | 65 °C | 50s/kb |        |
| Additional extension | 65 °C | 10min  |        |

#### PCR Result:

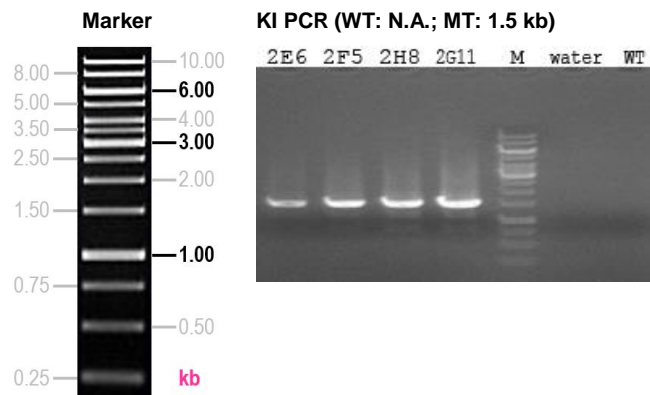

### 1.1.3. WT PCR

The potentially targeted clones were further screened by PCR for the presence of the WT site.

#### Primers for WT PCR:

WT-F (P5): 5'-CTCAAGTTATGAGAAGACGCTTGG-3'

WT-R (P6): 5'-TTCATTAACCTGTACTTGCTAGG-3'

#### Expected PCR Product:

Wildtype: N.A.

Targeted: ~406 bp

#### Reaction Mix:

| Component               | x1      |
|-------------------------|---------|
| ES cell genomic DNA     | 1.5 µl  |
| Forward primer(10 µM)   | 1.0 µl  |
| Reverse primer(10 µM)   | 1.0 µl  |
| P112 Taq DNA Polymerase | 12.5 µl |
| ddH <sub>2</sub> O      | 9.0 µl  |
| Total                   | 25.0 µl |

#### Cycling Condition:

| Step                 | Temp. | Time  | Cycles |
|----------------------|-------|-------|--------|
| Initial denaturation | 94 °C | 3 min |        |
| Denaturation         | 94 °C | 30 s  | 33 x   |
| Annealing            | 60 °C | 30 s  |        |
| Extension            | 72 °C | 30 s  |        |
| Additional extension | 72 °C | 5 min |        |
| storage temperature  | 25 °C |       |        |

#### PCR Result:

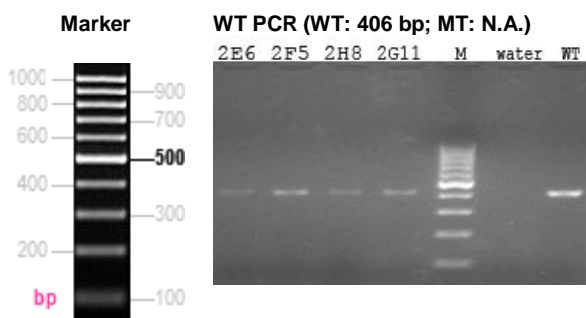

## 1.2. Result

Samples 2E6, 2F5, 2H8 and 2G11 have been confirmed as potentially targeted ES clones.

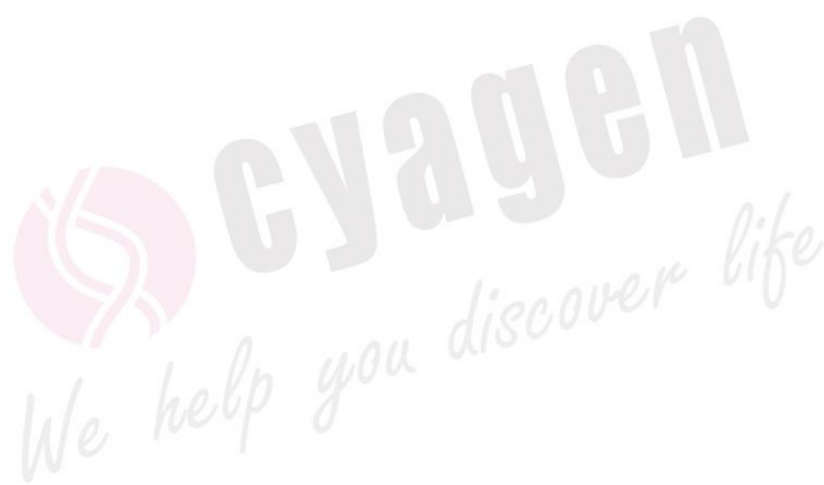



### 1.3. Southern Blot Analysis

The positive clones (2E6, 2F5, 2G11 and 2H8) from PCR screening were expanded and further characterized by Southern blot analysis. The Southern strategy is shown in the diagram below. The genomic DNA was digested with either *Scal* or *AflIII*, and hybridized using a Neo probe. The Neo probe is expected to detect the following DNA fragment from targeted allele in the Southern analysis: ~11.46 kb (with *Scal* digestion) and ~13.06 kb (with *AflIII* digestion).

**Diagram:**

Regions in the following diagram were selected for Southern blot.

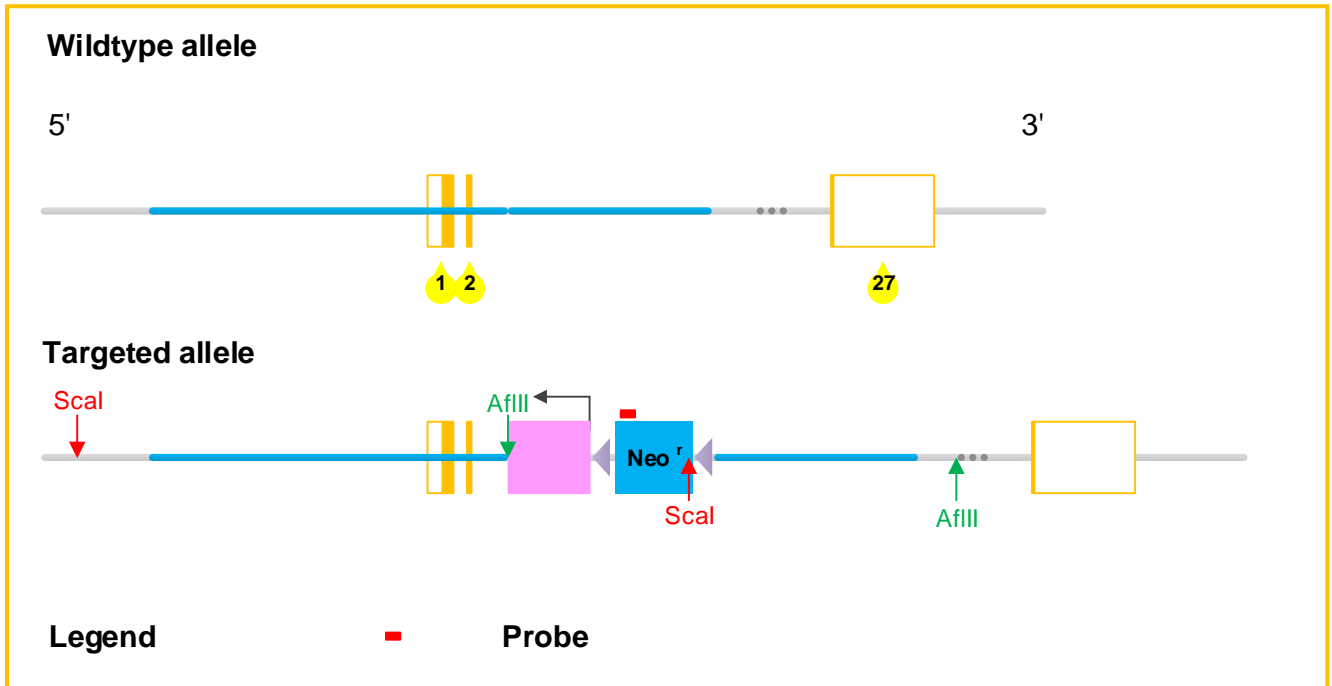

**Expected Fragment Sizes for Southern Blot:**

Neo Probe (containing 5'arm)-11.46 kb-*Scal*  
Neo Probe (containing 3'arm)-13.06 kb-*AflIII*

**Result:**

All of the four ES clones (2E6, 2F5, 2G11 and 2H8) were confirmed correct by Southern blot analysis.

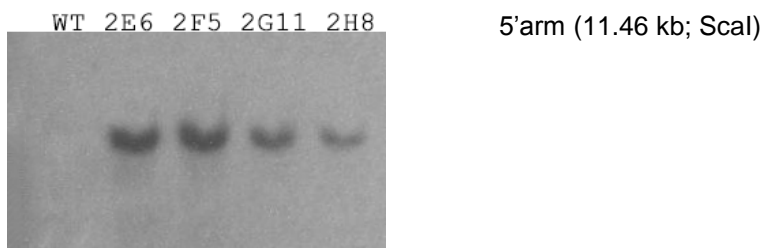

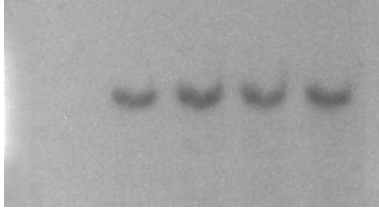

3'arm (13.06 kb; AflIII)

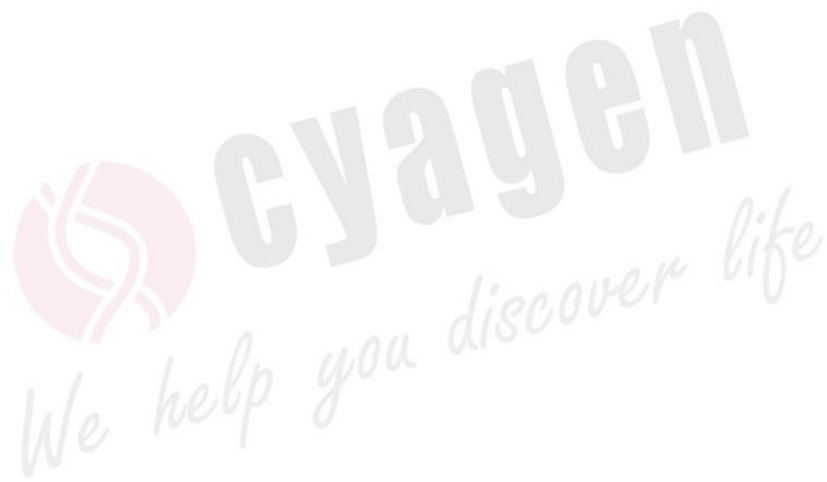

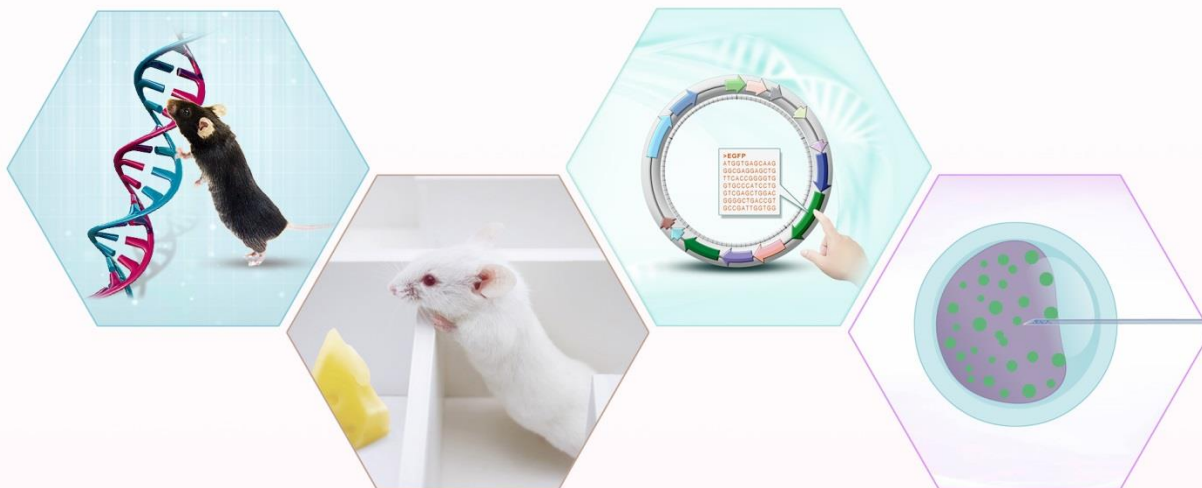

# Animal Report

Quote: TKK-171122-AMW-01  
Project: Mouse Uty Constitutive Knockin

**-Confidential-**

## 1. Animal Generation

Targeted ES cell clone 2E6 was injected into C57BL/6 albino embryos, which were then re-implanted into CD-1 pseudo-pregnant females. Founder animals were identified by their coat color, their germline transmission was confirmed by breeding with C57BL/6 females and subsequent genotyping of the offspring. The Neo cassette is self-deleted in germ cells so the offspring were Neo cassette-free. Eight male heterozygous targeted mice were generated from clone 2E6 as final deliverables for this project.

| 2E6 ESC, F1 mice                  |   |
|-----------------------------------|---|
| 8 Males ♂                         | - |
| D.O.B: 09-03-2018                 |   |
| Mouse ID: 1, 2, 3, 4, 7, 8, 9, 10 |   |

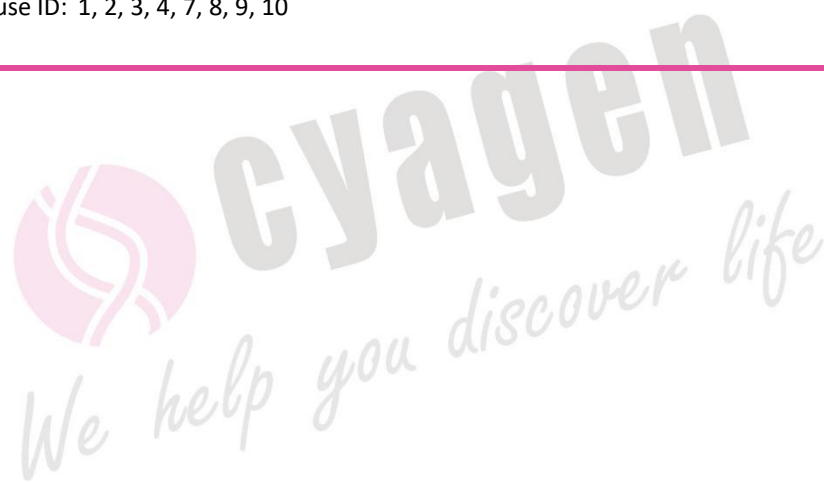

## 1.1. Genotyping Strategy

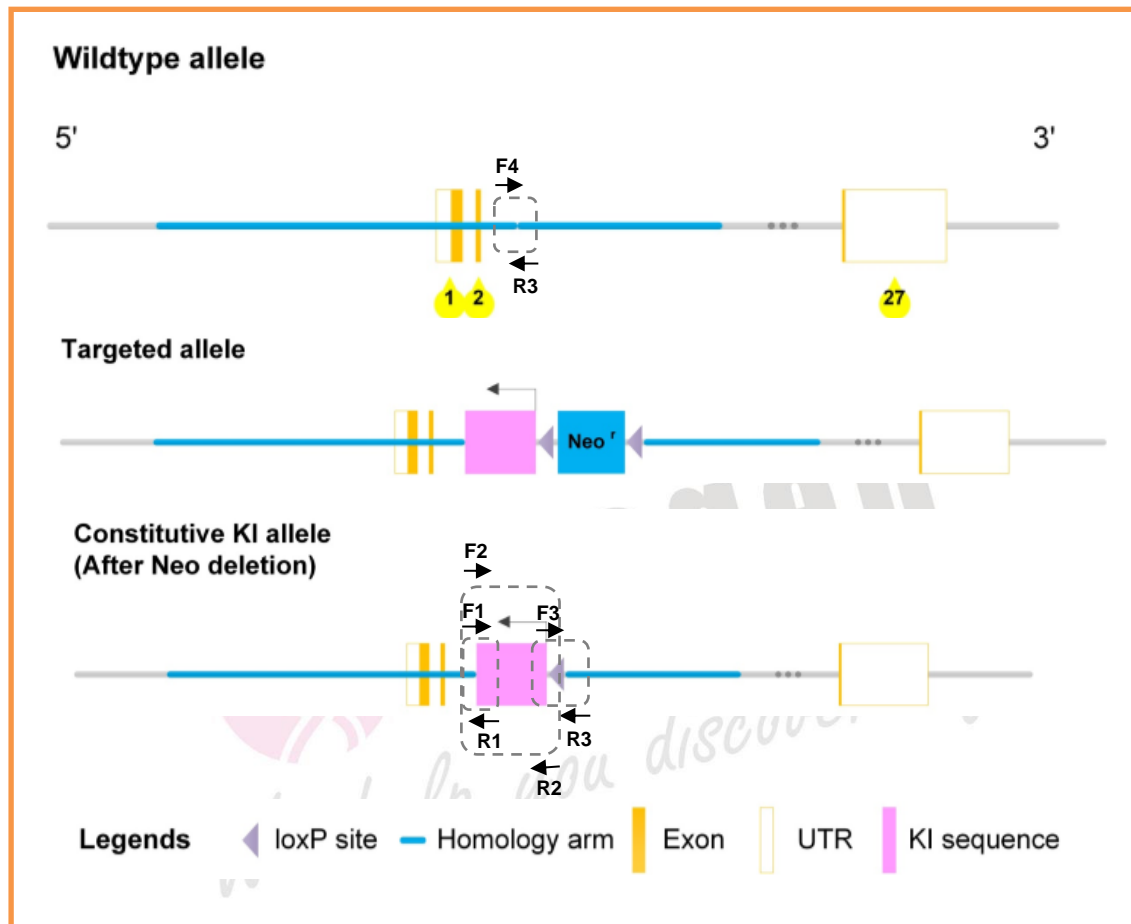

## 1.2. KI PCR

### Primers for KI PCR:

KI-F (F1): 5'-TGCTGGTATCAATCAAGATGGTGG-3'

KI-R (R1): 5'-AAGGACGAAACACCTGCAGAGAT-3'

### Expected PCR Product:

Wildtype: N.A.

Targeted: 194 bp

### Reaction Mix:

| Component              | x1      |
|------------------------|---------|
| Mouse genomic DNA      | 1.5 µl  |
| Forward primer (10 µM) | 1.0 µl  |
| Reverse primer (10 µM) | 1.0 µl  |
| Premix Taq Polymerase  | 12.5 µl |
| ddH <sub>2</sub> O     | 9.0 µl  |
| Total                  | 25.0 µl |

### Cycling Condition:

Quote: TKK-171122-AMW-01

| Step                 | Temp. | Time  | Cycles |
|----------------------|-------|-------|--------|
| Initial denaturation | 94 °C | 3 min | 33 x   |
| Denaturation         | 94 °C | 30s   |        |
| Annealing            | 62 °C | 35s   |        |
| Extension            | 72 °C | 35s   |        |
| Additional extension | 72 °C | 5 min |        |

### 1.3. KI1 PCR

#### Primers for KI1 PCR:

KI1-F (F2): 5'-GGTATCAATCAAGATGGTGGCTT-3'

KI1-R (R2): 5'-ATGTATGCTATACGAAGTTATTAGGTC-3'

#### Expected PCR Product:

Wildtype: N.A.

Targeted: 1.2 kb

#### Reaction Mix:

| Component                  | x1      |
|----------------------------|---------|
| DNA                        | 1.5 µL  |
| Forward primer (10 µM)     | 0.6 µL  |
| Reverse primer (10 µM)     | 0.6 µL  |
| dNTPs (2.5 mM)             | 1.8 µL  |
| 5X LongAmp Taq Reaction    | 3.0 µL  |
| LongAmp Taq DNA Polymerase | 0.9 µL  |
| ddH <sub>2</sub> O         | 6.6 µL  |
| Total                      | 15.0 µL |

#### Cycling Condition:

| Step                 | Temp. | Time   | Cycles |
|----------------------|-------|--------|--------|
| Initial denaturation | 94 °C | 3 min  | 33 x   |
| Denaturation         | 94 °C | 30s    |        |
| Annealing            | 60 °C | 30s    |        |
| Extension            | 65 °C | 50s/kb |        |
| Additional extension | 65 °C | 10min  |        |

### 1.4. Neo deletion PCR

#### Primers for Neo deletion PCR:

Neo-del-F (F3): 5'-GGCAGTGGGTGTTTCGTCCTT-3'

Neo-del-R (R3): 5'-AACTGTTTCATTTCCCCTCTCCTC-3'

Forward1 (F4): 5'-GGTAAGGAGATAAAGAGTTTCCGTAC-3'

#### Expected PCR Product:

Wildtype: 257 bp

Targeted: 448 bp

#### Reaction Mix:

| Component         | x1     |
|-------------------|--------|
| Mouse genomic DNA | 1.5 µl |

|                        |                |
|------------------------|----------------|
| Neo-del-F (F3) (10 µM) | 1.0 µl         |
| Neo-del-R (R3) (10 µM) | 1.5 µl         |
| Forward1 (F4) (10 µM)  | 0.5 µl         |
| Premix Taq Polymerase  | 12.5 µl        |
| ddH <sub>2</sub> O     | 8.0 µl         |
| <b>Total</b>           | <b>25.0 µl</b> |

**Cycling Condition:**

| Step                 | Temp. | Time  | Cycles |
|----------------------|-------|-------|--------|
| Initial denaturation | 94 °C | 3 min | 33 x   |
| Denaturation         | 94 °C | 30s   |        |
| Annealing            | 62 °C | 35s   |        |
| Extension            | 72 °C | 35s   |        |
| Additional extension | 72 °C | 5 min |        |

**1.5. Result:**

Eight pups (1#, 2#, 3#, 4#, 7#, 8#, 9# and 10#) from clone 2E6 were identified positive by PCR screening for KI, KI1 and Neo deletion, the positive pups were reconfirmed by PCR screening for KI1 and Neo deletion.

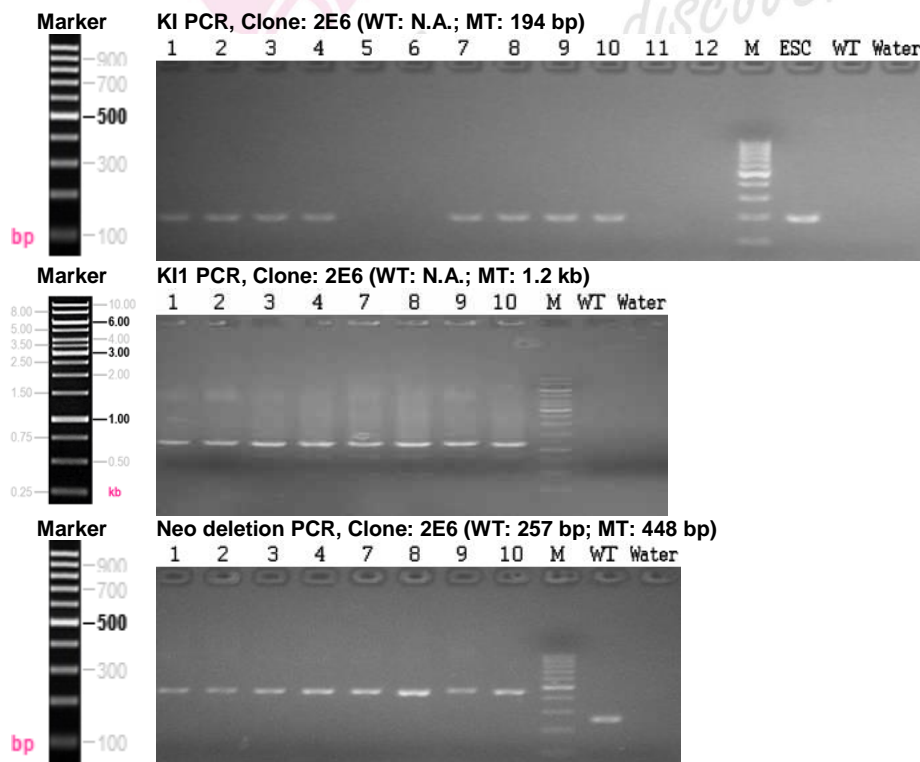



## 1.6. Suggested Breeding and Genotyping Assay for Tissue-specific knockin Mice Generation

**Step 1:** Inter-cross heterozygous loxP-flanked mice to generate homozygous loxP-flanked mice

Primers for targeted allele:

Neo-del-F (F3): 5'-GGCAGTGGGTGTTTCGTCCTT-3'

Neo-del-R (R3): 5'-AACTGTTTCATTTCCCCTCTCCTC-3'

Forward1 (F4): 5'-GGTAAGGAGATAAAGAGTTTCCGTAC-3'

Wildtype: 257 bp

Homozygotes: 448 bp

Heterozygotes: 448 bp/257 bp

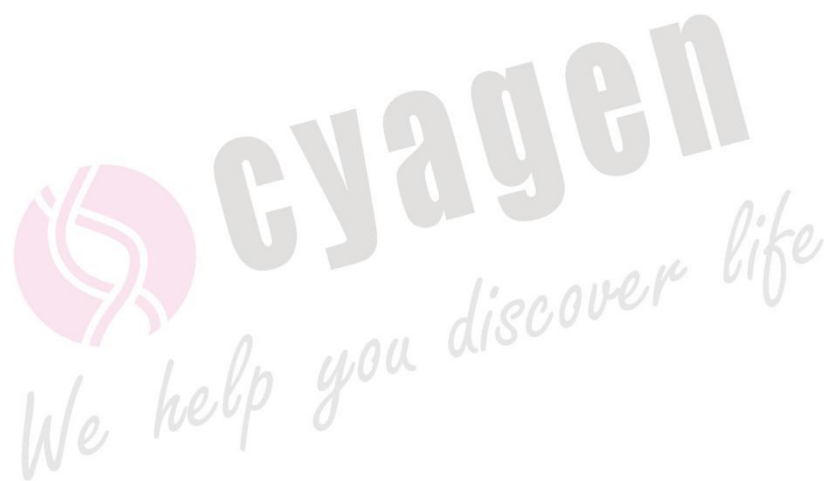

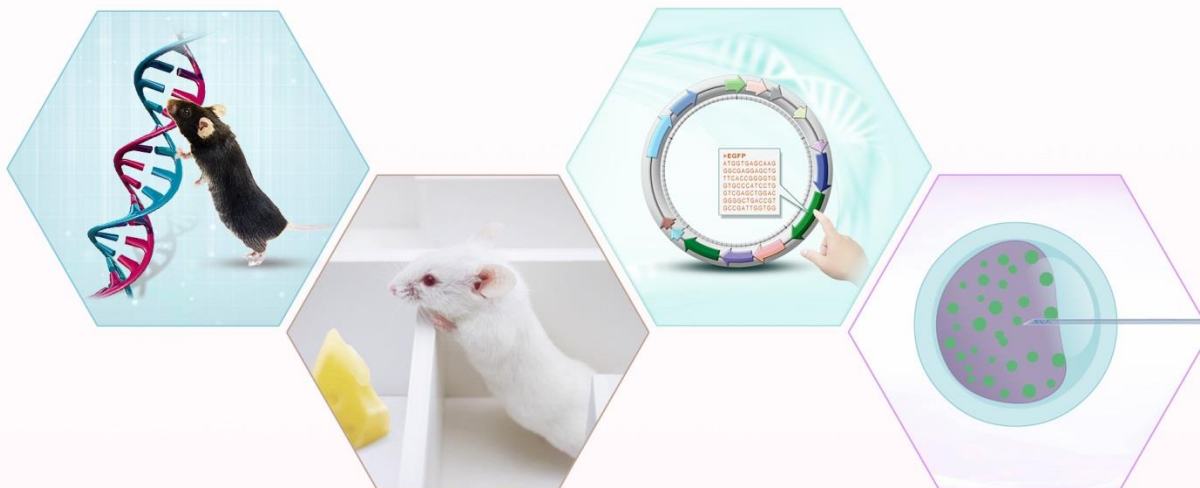

# Animal Report

Quote: TKK-171122-AMW-01  
Project: Mouse Uty Constitutive Knockin

**-Confidential-**

## 1. Animal Generation

Targeted ES cell clone 2H8 was injected into C57BL/6 albino embryos, which were then re-implanted into CD-1 pseudo-pregnant females. Founder animals were identified by their coat color, their germline transmission was confirmed by breeding with C57BL/6 females and subsequent genotyping of the offspring. The Neo cassette is self-deleted in germ cells so the offspring were Neo cassette-free. Four male heterozygous targeted mice were generated from clone 2H8 as final deliverables for this project.

| 2H8 ESC, F1 mice     |   |
|----------------------|---|
| 4 Males ♂            | - |
| D.O.B: 09-02-2018    |   |
| Mouse ID: 1, 2, 3, 4 |   |

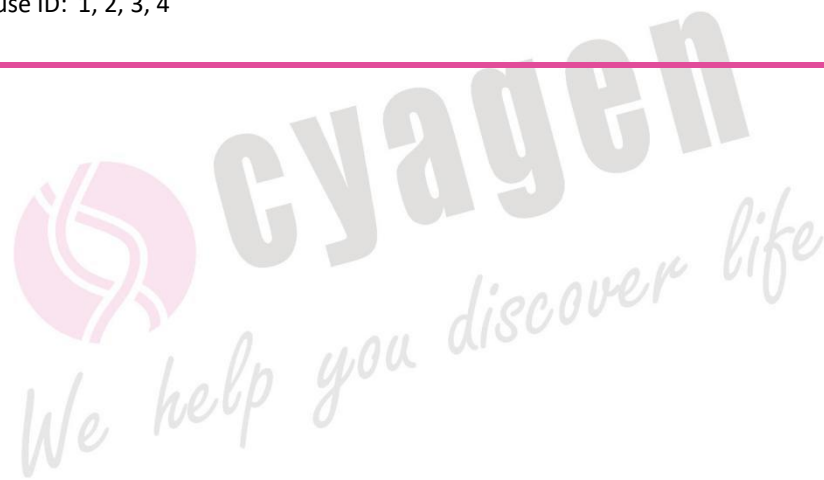

## 1.1. Genotyping Strategy

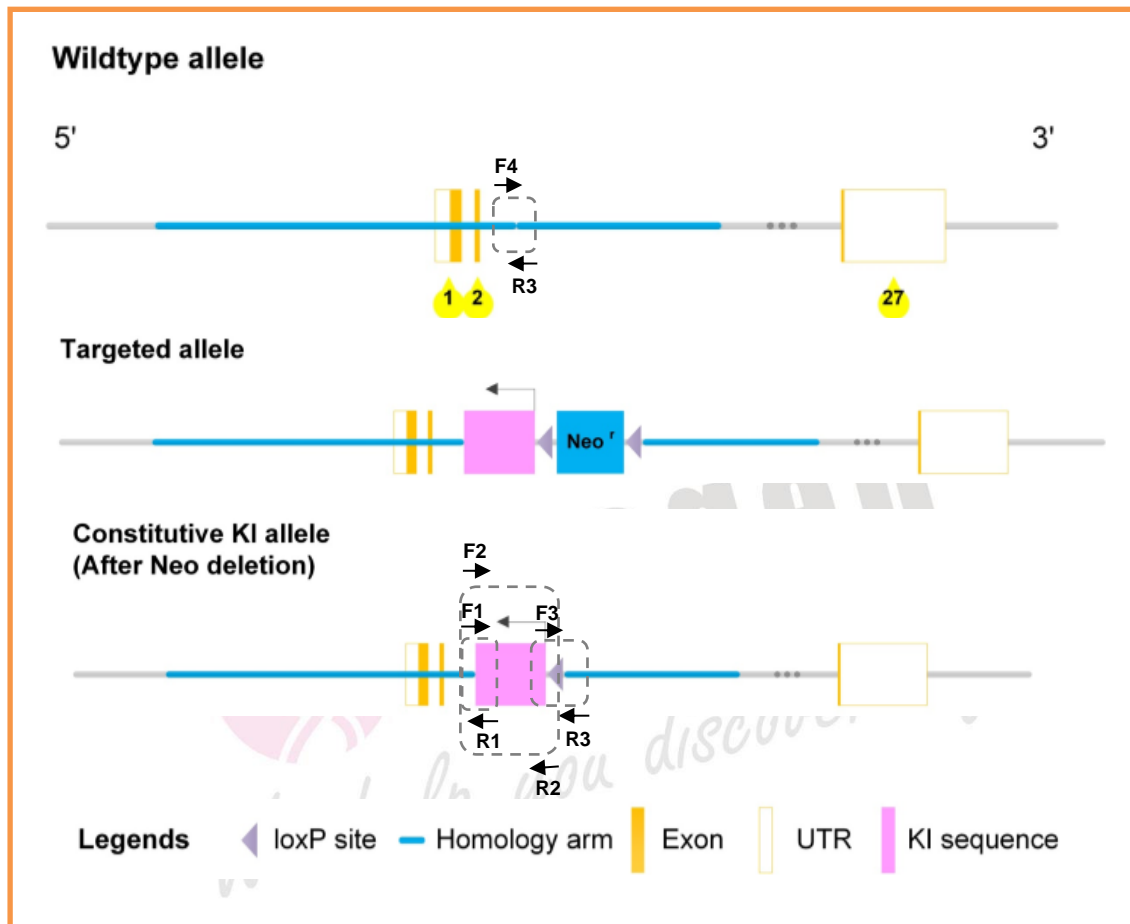

## 1.2. KI PCR

### Primers for KI PCR:

KI-F (F1): 5'-TGCTGGTATCAATCAAGATGGTGG-3'

KI-R (R1): 5'-AAGGACGAAACACCTGCAGAGAT-3'

### Expected PCR Product:

Wildtype: N.A.

Targeted: 194 bp

### Reaction Mix:

| Component              | x1      |
|------------------------|---------|
| Mouse genomic DNA      | 1.5 µl  |
| Forward primer (10 µM) | 1.0 µl  |
| Reverse primer (10 µM) | 1.0 µl  |
| Premix Taq Polymerase  | 12.5 µl |
| ddH <sub>2</sub> O     | 9.0 µl  |
| Total                  | 25.0 µl |

### Cycling Condition:

Quote: TKK-171122-AMW-01

| Step                 | Temp. | Time  | Cycles |
|----------------------|-------|-------|--------|
| Initial denaturation | 94 °C | 3 min | 33 x   |
| Denaturation         | 94 °C | 30s   |        |
| Annealing            | 62 °C | 35s   |        |
| Extension            | 72 °C | 35s   |        |
| Additional extension | 72 °C | 5 min |        |

### 1.3. KI1 PCR

#### Primers for KI1 PCR:

KI1-F (F2): 5'-GGTATCAATCAAGATGGTGGCTT-3'

KI1-R (R2): 5'-ATGTATGCTATACGAAGTTATTAGGTC-3'

#### Expected PCR Product:

Wildtype: N.A.

Targeted: 1.2 kb

#### Reaction Mix:

| Component                  | x1      |
|----------------------------|---------|
| DNA                        | 1.5 µL  |
| Forward primer (10 µM)     | 0.6 µL  |
| Reverse primer (10 µM)     | 0.6 µL  |
| dNTPs (2.5 mM)             | 1.8 µL  |
| 5X LongAmp Taq Reaction    | 3.0 µL  |
| LongAmp Taq DNA Polymerase | 0.9 µL  |
| ddH <sub>2</sub> O         | 6.6 µL  |
| Total                      | 15.0 µL |

#### Cycling Condition:

| Step                 | Temp. | Time   | Cycles |
|----------------------|-------|--------|--------|
| Initial denaturation | 94 °C | 3 min  | 33 x   |
| Denaturation         | 94 °C | 30s    |        |
| Annealing            | 60 °C | 30s    |        |
| Extension            | 65 °C | 50s/kb |        |
| Additional extension | 65 °C | 10min  |        |

### 1.4. Neo deletion PCR

#### Primers for Neo deletion PCR:

Neo-del-F (F3): 5'-GGCAGTGGGTGTTTCGTCCTT-3'

Neo-del-R (R3): 5'-AACTGTTTCATTTCCCCTCTCCTC-3'

Forward1 (F4): 5'-GGTAAGGAGATAAAGAGTTTCCGTAC-3'

#### Expected PCR Product:

Wildtype: 257 bp

Targeted: 448 bp

#### Reaction Mix:

| Component         | x1     |
|-------------------|--------|
| Mouse genomic DNA | 1.5 µl |

|                        |                |
|------------------------|----------------|
| Neo-del-F (F3) (10 µM) | 1.0 µl         |
| Neo-del-R (R3) (10 µM) | 1.5 µl         |
| Forward1 (F4) (10 µM)  | 0.5 µl         |
| Premix Taq Polymerase  | 12.5 µl        |
| ddH <sub>2</sub> O     | 8.0 µl         |
| <b>Total</b>           | <b>25.0 µl</b> |

**Cycling Condition:**

| Step                 | Temp. | Time  | Cycles |
|----------------------|-------|-------|--------|
| Initial denaturation | 94 °C | 3 min | 33 x   |
| Denaturation         | 94 °C | 30s   |        |
| Annealing            | 62 °C | 35s   |        |
| Extension            | 72 °C | 35s   |        |
| Additional extension | 72 °C | 5 min |        |

**1.5. Result:**

Four pups (1#, 2#, 3# and 4#) from clone 2H8 were identified positive by PCR screening for KI, KI1 and Neo deletion, the positive pups were reconfirmed by PCR screening for KI1 and Neo deletion.

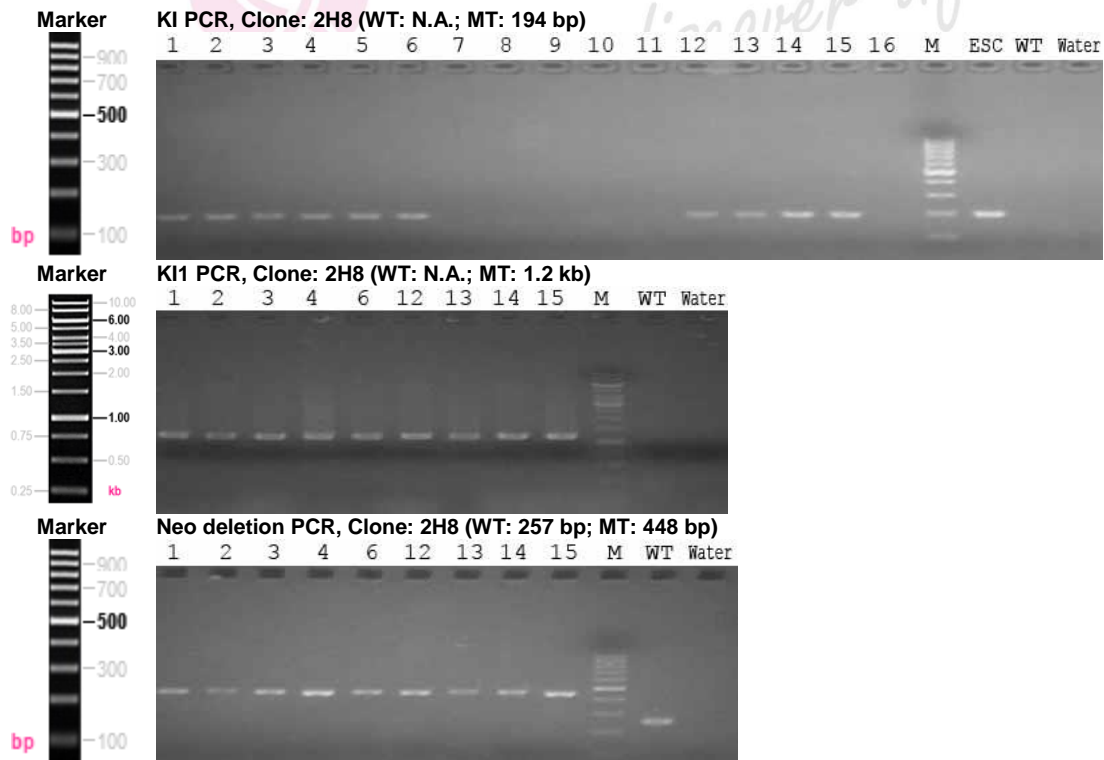

## 1.6. Suggested Breeding and Genotyping Assay

**Step 1:** Inter-cross heterozygous targeted mice to generate homozygous targeted mice

Primers for targeted allele:

Neo-del-F (F3): 5'-GGCAGTGGGTGTTTCGTCCTT-3'

Neo-del-R (R3): 5'-AACTGTTTCATTTCCCCTCTCCTC-3'

Forward1 (F4): 5'-GGTAAGGAGATAAAGAGTTTCCGTAC-3'

Wildtype: 257 bp

Homozygotes: 448 bp

Heterozygotes: 448 bp/257 bp



Supplement: Supplementary file [file media-1.pdf]
